# Supplementary material
Source: PubMed Central journal article supplement (PMC9040003)
Supplement: NIHMS1797588-supplement-sup.pdf [file NIHMS1797588-supplement-sup.pdf]

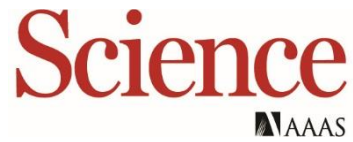

## Supplementary Materials for

### **RALF peptide signaling controls the polytubey block in *Arabidopsis***

Sheng Zhong *et al.*

Corresponding author: Li-Jia Qu, [qulj@pku.edu.cn](mailto:qulj@pku.edu.cn)

*Science* **375**, 290 (2022)  
DOI: 10.1126/science.abl4683

#### **The PDF file includes:**

Materials and Methods  
Figs. S1 to S12  
Tables S1 to S3  
References

#### **Other Supplementary Material for this manuscript includes the following:**

MDAR Reproducibility Checklist

## Materials and Methods

### Plant material and growth conditions

*Arabidopsis thaliana* (Arabidopsis, Columbia-0 ecotype) was used as wild type (WT) plant. The T-DNA insertion mutants *fer-4* [GK-106A06, GABI-Kat, (12)] and *myb97 myb101 myb120* [*myb97-1 myb101-1 myb120-3*, (19)] were gifted from De Ye (College of Biological Sciences, China Agricultural University). The *anj herk1* and *fer anj herk1* [*herk1 anj* and *herk1 anj* CRISPR *fer* #27, respectively, (13)] were gifted from Lisa Smith (Department of Animal and Plant Sciences, University of Sheffield). *fer*<sup>+/-</sup> was gifted from Chao Li (East China Normal University) and Qiaohong Duan (Shandong Agricultural University). *aca9* [*aca9-1*, ssJH no. 108, (27)] was gifted by Jeffrey F. Harper (College of Agriculture, Biotechnology and Natural Resources, University of Nevada). The *anj*<sup>-/-</sup> *herk1*<sup>+/-</sup> and *anj*<sup>+/-</sup> *herk1*<sup>-/-</sup> were screened from the F2 generation of cross between WT and *anj herk1* mutant. These mutants were confirmed by polymerase chain reaction (PCR) and DNA sequencing as described previously with primers listed in Table S2.

Plants were grown in a growth chamber with LED lights (GPL production modules DR/W and DR/B/FR, Philips) under long-day conditions (16 hr light/ 8 hr dark) at 22 ± 2°C.

### Phylogenetic analysis

Protein sequences of the CrRLK1L family and the recently re-annotated RALF family (20) of Arabidopsis (Table S1) were downloaded from the Arabidopsis Information Resource (<http://www.arabidopsis.org/>). Phylogenetic analysis was performed by using MEGA X (<http://www.megasoftware.net/>). Full-length amino acid sequences were used for ClustalW sequence alignment. Based on conserved residues, Neighbor-Joining trees were constructed with 500 replicates of bootstrap.

### Plasmid construction and plant transformation

To generate the GFP reporters for RALF genes, genomic sequence of each *RALF* gene containing the promoter region and the coding sequence was cloned into pDONR221 and finally cloned into the vector pK7FWG0, which was developed from pK7FWG2 (Department of Plant Systems Biology, VIB-Ghent University), by using BP and LR reaction following the protocol of the manufacturer (Invitrogen). The promoter region of each gene is indicated by the primers listed in Table S2. The obtained construct was transformed into WT plants.

For promoter-GUS reporter assays, promoters of each *RALF* gene were cloned into pDONR221, and then pB7GUSWG0 (33) by using BP and subsequent LR reaction. The obtained construct was transformed into WT plants.

For receptor reporter lines, a nuclear localized mCitrine under the control of *FER*, *ANJ* or *HERK1* promoter regions together with a ubiquitous expressed plasma membrane marker were cloned via Golden Gate assembly using the GreenGate plasmid set (34). Therefore, the 5' regions of *FER* (1,420 bp), *ANJ* (2,235bp) or *HERK1* (2,388bp) were amplified by PCR using Col-0 genomic DNA as template and cloned into the pGGA000 plasmid to generate the pGGA\_*FER*, pGGA\_*ANJ* and pGGA\_*HERK1* constructs. In the following assembly of the M-intermediate plasmids, pGGA\_*FER*, pGGA\_*ANJ* and pGGA\_*HERK1* were combined with pGGB005 (SV40-NLS), pGGC\_GSAGAG-mCitrine, pGGD\_SGAGAG-mCitrine, pGGE\_HSP18.2 and pGGG001 (F-H) into pGGM000 to generate pBLAM065 (*FER*pro:NLS-mCit-mCit\_HSP18.2\_FH), pBLAM067 (*ANJ*pro:NLS-mCit-mCit\_HSP18.2\_FH) and pBLAM066 (*HERK1*pro:NLS-mCit-mCit\_HSP18.2\_FH) constructs. Furthermore, the N-intermediate pBLAN038 (HA\_P16pro:mScatlet-Remorin-Anker\_HSP18.2\_Basta) was cloned by assembly of pGGG002

(H-A), pGGA005 (P16), pGGB002 (Omega element), pGGC\_GSAGAG-mScarlet, pGGD\_Remorin-Anker, pGGE\_HSP 18.2, and pGGF009 (BASTA selection marker) into pGGN000. In a final Golden Gate assembly reaction, different M-intermediates were combined with pBLAN038 into pGGZ003 to create final expression plasmids pBLAZ179 (FERpro:NLS-mCit-mCit\_HSP18.2\_FH\_HA\_P16pro:mScarlet-Remorin-Anker\_HSP18.2\_Basta), pBLAZ181 (ANJpro:NLS-mCit-mCit\_FH\_HA\_P16pro:mScarlet-Remorin-Anker\_HSP18.2\_Basta) and pBLAZ180 (HERK1pro:NLS-mCit-mCit\_FH\_HA\_P16pro:mScarlet-Remorin-Anker\_HSP18.2\_Basta), respectively. FER gene reporter line was created by cloning the FER gene into pGGAE00 to create pGGAE\_FERpro:FER. The M intermediate pBLAM068 (FERpro:FER-mCit\_HSP18.2\_FH) was assembled by the combination of pGGAE\_FERpro:FER, pGGD\_SGAGAG-mCitrine, pGGE\_HSP 18.2 and pGGG001 (F-H) into pGGM000. The finale expression plasmid was generated by the assembly of pBLAM068 and pBLAN038 into pGGZ003 resulting in pBLAZ182 (FERpro:FER-mCit\_HSP18.2\_FH\_HA\_P16pro:mScartlet-Remorin-Anker\_HSP18.2\_BASTA).

*Arabidopsis* plants were transformed through the floral dip method with agrobacteria GV3101 strain (35).

### RNA-seq analysis

For RNA-seq of transmitting tract and septum tissues, WT flowers were emasculated and excised 30 hours later. After removing the stigma and style, pistils were longitudinally cut and opened along both sides of the septum. Septum tissues were collected after carefully removing funiculus and ovules with a syringe needle and transferred immediately into liquid nitrogen. Total RNA was extracted from septum tissues of 30 flowers by using the Plant Total RNA Purification Kit (GeneMark). RNA was sequenced with a Hi-seq PE150 sequencer by Novogene.

For RNA-seq of WT and *myb97 myb101 myb120* plants (3 replicates for each group), semi-*in vivo* germinated pollen tubes were used to extract RNA for sequencing with an Illumina Hi-seq 2500 sequencer in the Biodynamic Optical Imaging Center (BIOPIC) of Peking University followed by bioinformatic analysis on the High Performance Computing Platform of the Center for Life Science.

To analyze RNA-seq data, Tophat2 (36) was used to align clean reads with the *Arabidopsis* genome version in TAIR10 with default parameters. Cufflinks (37) was used to calculate and normalize the differential expression levels of RNA from these two samples using FPKM (Fragments Per Kilobase of transcript per Million fragments mapped) values.

### Real-time RT-qPCR

Transmitting tract and septum tissues from 3 emasculated pistils were manually collected under a stereomicroscope at 30 HAE (hours after emasculatation). Total RNA was isolated using Dynabeads™ mRNA DIRECT™ Micro Purification Kit (Thermo Scientific). Eluted RNA was reverse-transcribed using Superscript™ II reverse transcriptase Kit (Thermo Scientific). Each cDNA was amplified by KAPA HiFi HotStart ReadyMix (Roche) for 19 cycles and purified by Agencourt AMPure XP beads (Beckman Coulter). The reverse transcription and amplification steps were adapted from a published procedure (38). For real-time RT-qPCR, three biological replicates were performed using UltraSYBR Mixture (CWbiotech) on a QuantStudio 3 Real-Time PCR System (Applied Biosystems). *ACTIN8* (At1g49240) was used as internal control to calculate relative expression levels of each gene. Primers used for RT-qPCR are listed in Table S2.

### Plasmid construction and plant transformation for CRISPR/Cas9-mediated mutagenesis

All *ralf* mutants were obtained by previously reported egg cell-specific promoter-controlled CRISPR/Cas9 system (39, 40). For the *ralf6 ralf7 ralf16* mutant, two fragments containing four sgRNAs or three fragments containing six sgRNAs were amplified from pCBC-DT1T2 by using the primers RALF6\_BsF/F0-1 and RALF6\_BsR/R0-1, RALF7\_BsF/F0-1 and RALF16\_BsR/R0-1; RALF6\_BsF/F0-2 and RALF6\_BsR/R0-2, RALF7\_BsF/F0-2 and RALF7\_BsR/R0-2, RALF16\_BsF/F0-2 and RALF16\_BsR/R0-2, then cloned into pENTR-MSR respectively (33) to produce pENTR-RALF6 and pENTR-RALF7-16. The two dual-spaces were finally constructed into the vector pENTR-RALF6-7-16 by digestion and ligation using *Spe I/Hind III* and *Xba I/Hind III*, respectively. The fragment amplified from pENTR-RALF6-7-16 with primers of RALF6\_BsF and RALF16\_BsR, was cloned into pHEE401E by Golden-Gate Cloning (41), producing the destination vector pHEE401E-RALF6-7-16. To obtain *ralf36 ralf37* mutants, RALF36\_sgRNA1\_U6\_26t-U6\_29p-RALF37\_sgRNA2 was amplified from pCBC-DT1T2 by using the primers RALF36-BsF/F0 and RALF37-BsR/R0. The dual-spacers were cloned into pHEE401E binary vector to produce the plasmid pHEE401E-RALF36-37. Constructs pHEE401E-RALF6-7-16 and pHEE401E-RALF36-37 were transformed into WT plants by *Agrobacterium*-mediated floral dip method (35). To obtain the *ralf6 ralf7 ralf16 ralf36 ralf37* quintuple mutants, pHEE401E-RALF36-37 was transformed into the *ralf6 ralf7 ralf16* triple mutant and screened for quintuple mutants. The *hap2*<sup>-/-</sup> mutants were obtained by using the similar strategy as for *ralf36 ralf37* mutants with the primer pairs HAP2-BsF/F0 and HAP2-BsR/R0.

### Transgenic plants screening for *ralf* mutants by CRISPR/Cas9 technology

T<sub>0</sub> generation seeds were screened on the resistant plate with 37.5 µg/mL hygromycin. In the T<sub>1</sub> generation, plants with effective mutations were identified by direct sequencing of PCR products by using identifier-primers (RALF6-CRI-F/R, RALF7-CRI-F/R, RALF16-CRI-F/R, RALF36-CRI-F/R and RALF37-CRI-F/R). The mutation pattern was reconfirmed in the T<sub>2</sub> generation. Cas9-free plants were identified by Hyg-IDF/ Hyg-IDR. Cas9-free seeds were confirmed by growing on resistant plates.

### Semi-*in vivo* ovule targeting assay

The semi-*in vivo* ovule targeting assay was conducted as described previously (10, 42). Emasculated WT stigmas were hand cut and placed onto solid pollen germination medium (SPGM: 0.01% H<sub>3</sub>BO<sub>3</sub>, 5 mM CaCl<sub>2</sub>, 5 mM KCl, 1 mM MgSO<sub>4</sub>, 15% w/v sucrose, pH adjusted to 7.5 with KOH in 1.2% w/v low gelling temperature agarose) in a small culture dish with a 2-mm-thick, 14-mm-diametral cover glass in the bottom center. Appropriate numbers of pollen grains were placed on excised stigma and each three ovules positioned with complete funiculus at appropriate distances below cut stigmata. Then, culture dishes were placed into a 22°C incubator allowing pollen germination, growth, and attraction. Each assay was conducted with three biological repeats and 3-5 samples for each repeat.

### Pollination assay, aniline blue staining, and microscopic observation

For aniline blue staining, pollen grains were collected from freshly opened flowers, and pollinated to pistils that had been emasculated 24-36 hours earlier. At certain hours after pollination, siliques were harvested and fixed in acetic acid/ethanol 1:3 for more than two hours in vacuum, then rehydrated through a series of ethanol (70%, 50%, 30%) and ddH<sub>2</sub>O for 15 min each time. After treatment with 8 M NaOH overnight, samples were rinsed with ddH<sub>2</sub>O twice and

stained with aniline blue solution (0.3% decolorized aniline blue, in 108 mM  $K_3PO_4$ ) for more than 2 hours in the dark. Stained samples were observed under a fluorescence microscope (Olympus BX51 and Zeiss Axio Imager D2) equipped with an ultraviolet filter set. Pollen tube length was measured and processed with Fiji (Image J).

Histochemical GUS staining was performed as previously reported (5). Briefly, inflorescences or pistils were incubated in 90% acetone on ice for 30 minutes. Then samples were rinsed by phosphate buffer [50 mM  $Na_2HPO_4/NaH_2PO_4$  (pH7.0), 2 mM  $K_3Fe(CN)_6$ , 2 mM  $K_4Fe(CN)_6$ ] twice for 15 minutes each time, transferred into a staining solution containing 2 mM X-gluc (Sigma), infiltrated under the vacuum for 2 hours and incubated in 37°C. 70% ethanol was used to terminate staining. Samples were rehydrated by 50%, 30%, 10% of ethanol and finally ddH<sub>2</sub>O.

For SEM, flowers at floral stage 12 were emasculated. Excessive pollen grains were placed on the emasculated stigma 36 hours later. After 5 hours of pollination, the pistils were fixed in FAA (100 mL: 50 mL ethyl alcohol, 5 mL glacial acetic acid, 5 mL formaldehyde and 40 mL ddH<sub>2</sub>O). Fixed pistils were dehydrated in a graded ethanol series of 50%, 60%, 70%, 80%, 95% and 100% (30 min each time). Pistils were subsequently CO<sub>2</sub>-critical point-dried (Hitachi critical point dryer, HCP-2; Hitachi Koki) and mounted for further dissection. After sputter coating with gold, samples were examined with a Scanning Electron Microscope (Hitachi S3000N, JOEL JSM-6610).

For confocal microscopy of the receptor reporter lines, hand cross-sections of pistils were imaged using a Zeiss LSM980/Airyscan 2 microscope with GaAsP-PMT detectors. mCitrine (displayed in magenta) was excited using the 488 nm diode laser and emission was captured from 499-552 nm. mScarlet (displayed in gray) was excited using a 561 nm diode laser and emission was captured from 570-632 nm in a two-track process. Images of the septum were acquired with a VisiScope Spinning Disc system from Visitron using a 40× objective, and processed using Zeiss ZEN 3.1, ZEN blue 3.4.91 and Fiji (Image J).

#### Detection of RALF36 and RALF37 in pollen tubes by immunostaining

Pollen grains were placed on solidified SPGM and germinated in a humid box at 22°C for 4 hours. Detection of RALF36 and RALF37 by immunostaining was conducted according to a previously reported protocol (43). Pollen tubes were fixed in 4% paraformaldehyde in PEM (50 mM PIPES, 5 mM EGTA, 5 mM  $MgCl_2$ , pH6.9) with 18% sucrose for 90 min. Subsequently, pollen tubes were washed with PEM once and PBS (137 mM NaCl, 2.7 mM KCl, 10 mM  $Na_2HPO_4$ , 2 mM  $KH_2PO_4$ , pH 7.0) twice. Pollen tubes were incubated overnight at 4°C in a solution of PBS containing 3% BSA (Bovine Serum Albumin) with RALF36 or RALF37 primary antibody (diluted at 1:100) followed by three washes in PBS with 3% BSA. Subsequently, samples were incubated with Alexa Fluor 488 goat anti-rabbit IgG (Catalog # A11008, Invitrogen) for RALF36 and RALF37 (diluted at 1:800 in PBS with 3% BSA) for 2 hours at room temperature, then washed three times with PBS containing 3% BSA. Pollen tube rupture treatment was done with 8% D (-) Mannitol (Catalog # M9647, Sigma) for 2 minutes or 15 minutes before fixation.

Primary antibodies against RALF36 and RALF37 were raised and produced by ABclonal Biotechnology. Pollen tubes were observed under a confocal laser scanning microscope (Nikon A1R) using a 40× objective. Samples were excited under 488 nm laser with emitted light measured at 500-550 nm for GFP observation. Fluorescence pixel intensities of images were measured using ImageJ software.

### Recombinant protein expression, purification and peptide synthesis

C-terminus His-tagged ectoFER, ectoANJ and ectoHERK1 were expressed and purified according to a previously described protocol (44). Extracellular domain sequences of FER (residues 27-447), ANJ (residues 25-405) and HERK1 (residues 25-405) were cloned into a modified pFastBac 1 vector (Invitrogen) with an N-terminal hemolin signal peptide. Recombinant baculoviruses with sf21 insect cells (cultured in the SF-900 medium at 28°C) were generated and amplified according to the Bac-to-Bac baculovirus expression system (Invitrogen). Both proteins were expressed in High Five insect cells (Invitrogen) at 22°C. One litre of cells ( $2.0 \times 10^6$  cells/mL) was infected with 30 ml recombinant baculovirus. Supernatant was collected via centrifugation after infection for 60 hours. Fusion proteins were purified using Ni-NTA (Novagen) from the supernatant. Purified proteins were eluted by elution buffer containing 25 mM Tris-HCl pH8.0, 150 mM NaCl, 250 mM imidazole and further purified by size-exclusion chromatography (Hiload 16/60 Superdex 200 prep grade, GE Healthcare) in buffer containing 10 mM Bis-Tris pH 6.0, 100 mM NaCl. C-terminal His-tagged ectoCVY1 (residues 22-398) was expressed and purified through a similar procedure as described above for ectoFER, ectoANJ and ectoHERK1. C-terminal HA-tagged FER (residues 27-447) or ANJ/HERK1 (residues 25-405) was generated by reconstructing the expression vector. Briefly, the sequence of 3×HA tags followed by a prescission protease cleavage site was inserted between ectoFER (or ectoANJ or ectoHERK1) and C-terminal 6×His tag. HA-tagged protein was expressed in High Five insect cells as described above. Initial purification of HA-tagged ectoFER (or ectoANJ or ectoHERK1) protein was performed using Ni-NTA (Novagen) with buffer containing 25 mM Tris-HCl, pH8.0, 150 mM NaCl. The His-tag was then removed using prescission protease (purified in our own lab). Obtained proteins were further purified through size-exclusion chromatography (Hiload 16/60 Superdex 200 prep grade, GE Healthcare) in buffer containing 10 mM Bis-Tris pH6.0, 100 mM NaCl.

MBP-tagged ectodomains were expressed in *E. coli* and extracted as previously described (45). Sequences of ectodomain were cloned into the pMALGW vector (46), and then transformed into the BL21 *E. coli* strain obtained from TransGen Biotech. 1/1000 1M IPTG was added to induce protein expression at 18°C overnight when bacteria were grown at 37°C to an OD<sub>600</sub> of 0.5. Induced bacteria were collected at room temperature and centrifuged. Pellets were re-suspended with MBP lysis buffer (25 mM Tris, pH8.0, 100 mM NaCl, 5% Glycerol), and subsequently sonicated at intervals of 10 sec-work and 20 sec-rest for up to 10 minutes. Insoluble pellets were removed and suspensions transferred into a new tube after centrifugation. Protein extracts were incubated with MBP-beads (Amylose resin, NEB) at 4°C. MBP wash buffer made by Tris, NaCl and Glycerol at the same concentration as in MBP lysis buffer was used to clean beads for 5 times and MBP elution buffer (MBP lysis buffer and 10 mM maltose) was added to elute MBP-tagged proteins from beads.

Biotinylated RALF and elf24 peptides used in this study (Table S3) were synthesized by Scilight Biotechnology LLC with a purity higher than 95%. All peptides were diluted in sterile ddH<sub>2</sub>O.

### Pull-down assays between RALF peptides and RLK ectodomains

Purified tagged RLK ectodomains were mixed with biotinylated RALF peptides in 500 µL pull-down buffer (20 mM Tris-HCl, pH7.5, 1% IGEPAL) and incubated at 4°C for 1 hour. RLK ectodomain samples and RALF peptides were used at a final concentration of 50 nM in one tube. Then 50 µL Streptavidin Magnetic Beads (New England Biolabs) were added in each sample for three hours incubation at 4°C and washed with 1.0 mL pull-down buffer for 5-6 times. Bound proteins were eluted with 100 µL SDS loading buffer from beads at 100 °C for 10 min. SDS-PAGE

and western blot analysis were used to exam the interaction. Mouse anti-His antibody (TransGen Biotech, 1:5,000 for detection), mouse anti-HA antibody (Sigma-Aldrich, H9658, 1:5,000 for detection), mouse anti-MBP antibody (ABclonal, AE016, 1:5,000 for detection), goat anti-mouse IgG HRP conjugated secondary antibody (Cwbio, CW0102S, 1:3,000 for detection) were used in western blots. All experiments were repeated for at least three times.

The dose gradient assay was conducted in the same condition while the concentrations of the peptides were adjusted to the range of 0 to 20  $\mu$ M. For the interaction enhancement assay, 5 nM His-tagged ectoFER and 25 nM HA-tagged ectoANJ or ectoHERK1 were incubated together with 125 nM peptide in TBST buffer (50 mM Tris-HCl, pH7.5, 150 mM NaCl, 0.1% Tween-20) at 4°C for 1 hour. Then, 30  $\mu$ L Chelating Sepharose Fast Flow (GE Healthcare, GE17-0575-01) was added to incubate at 4°C for another 1 hour. All samples were washed for 5-6 times with TBST buffer. After elution, protein samples were subjected to SDS-PAGE and western blot analysis to exam interactions.

#### Microscale thermophoresis (MST) assay

MST assays were applied to determine the binding affinities. 200 nM purified His-tagged ectoFER, ectoANJ, ectoHERK1 or ectoCVY1 was labelled with 100 nM His-labeling dye solution introduced in the kit (Monolith™ His-Tag Labeling Kit RED-tris-NTA, MO-L008) for 30 min at room temperature in HEPES buffer (10 mM HEPES, 150 mM NaCl, 0.05% P20). Labelled proteins were mixed with a prepared gradient-diluted RALF peptide concentrations ranging from 0.0076 to 250  $\mu$ M in the HEPES buffer (the final concentration of protein samples is 50 nM). Then samples were centrifuged at 13,000 rpm and 4°C for 10 min and loaded into the capillaries (Monolith™ NT.115 Standard Treated Capillaries, MO-K022). All measurements were performed using a Monolish NT.115 device (NanoTemper Technologies) at medium MST power and 80% LED power. Raw data was analyzed by MO Affinity Analysis software (V2.2.4). All experiments were repeated for at least three times.

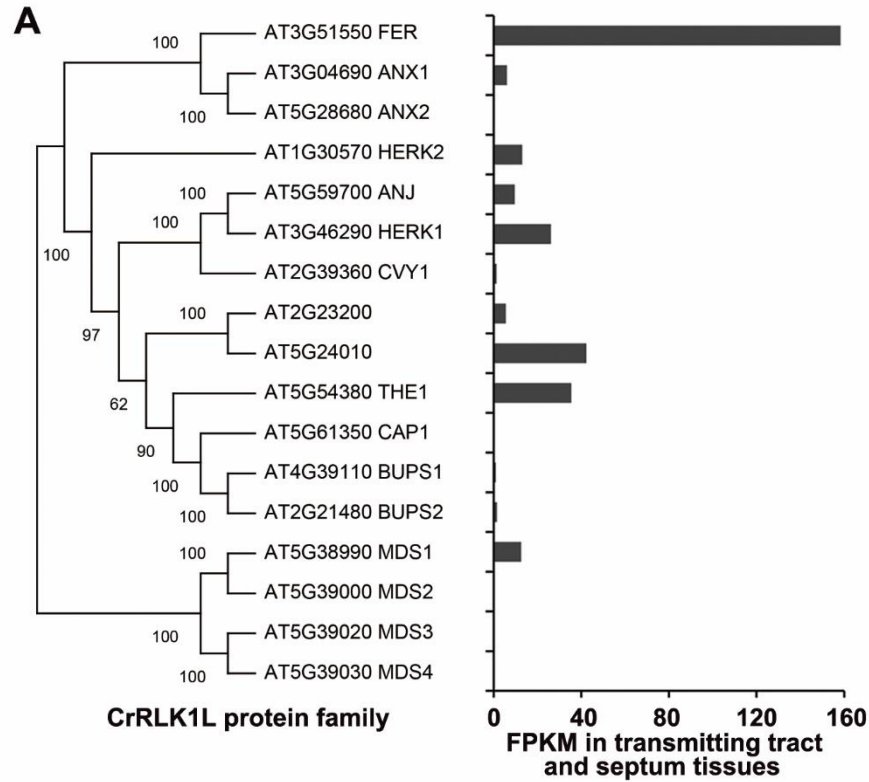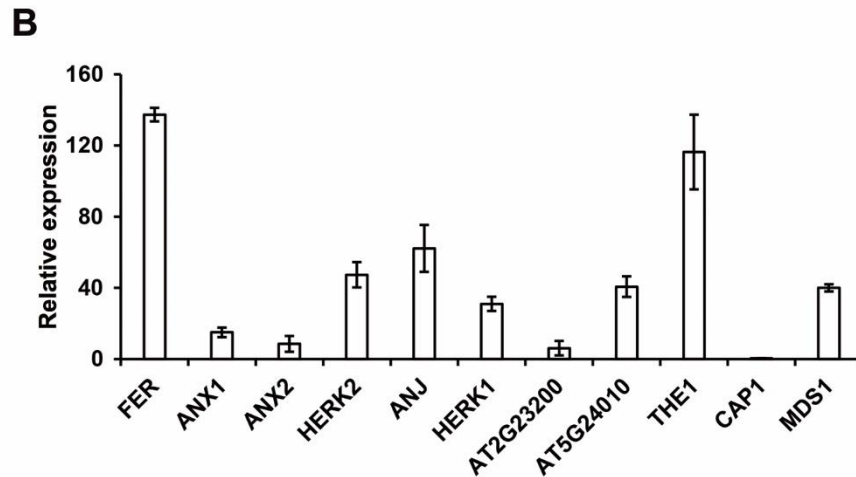

**Fig. S1. Gene expression analysis of *MLD-RLK (CrRLK1L)* family members in transmitting tract and septum tissues.**

Relative expression levels of the *MLD-RLK (CrRLK1L)* family in wild type transmitting tract and septum tissues from RNA-seq data. Phylogenetic tree based on full-length protein sequences to indicate the relationship of the 17 members. Sequence alignment and bootstrap tree construction were conducted by MEGA-X, using ClustalW and Neighbor-Joining strategy, respectively. FPKM: Fragments Per Kilobase per Million fragments mapped. **(B)** Real-time RT-qPCR analysis of transcript levels of *CrRLK1L* family members in the septum tissues. *ACTIN8* was used as an internal control for quantification. n=3, data are mean values  $\pm$  SD.



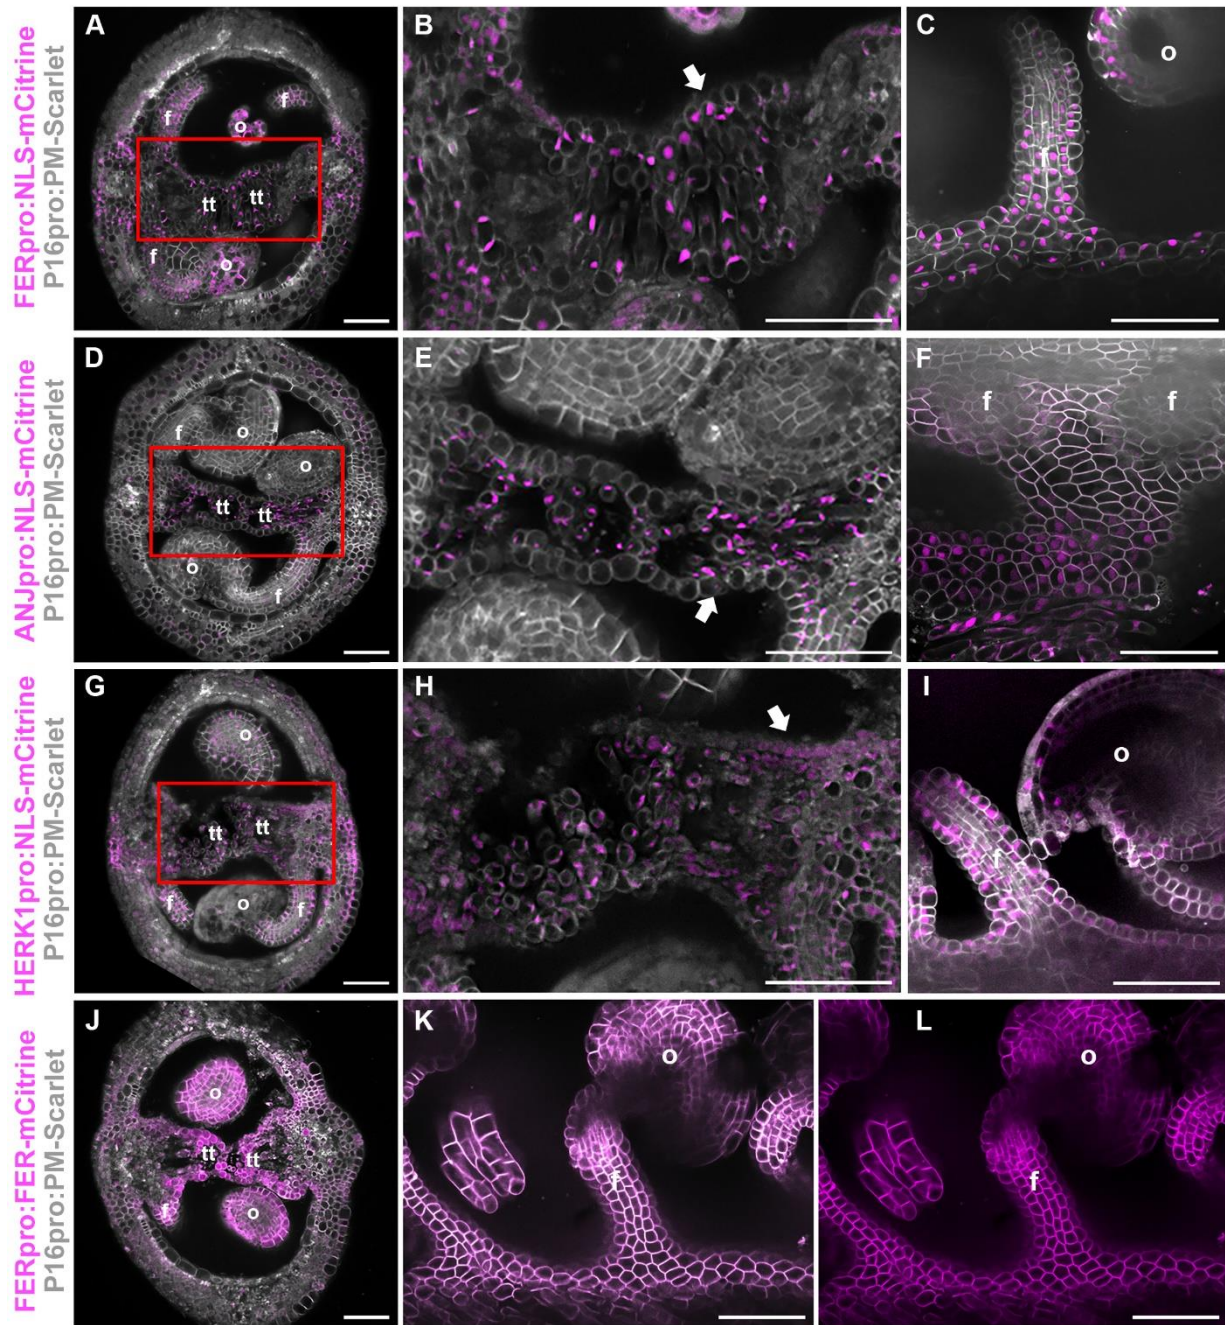

**Fig S2. Expression pattern of FER, ANJ and HERK1 in the pistil of *Arabidopsis thaliana*.**

Cross-sections (A, D and G) and longitudinal sections (C, F and I) showing expression pattern of NLS-2×mCitrine reporter (magenta) under control of the FER (A and B), ANJ (D and E) and HERK1 (G and H) promoter regions together with an mScarlet-labeled plasma membrane marker driven by the P16 promoter. (B, E, H) Magnification of the transmitting track region indicated in the red box in A, D and G. White arrows indicate signals in epidermal layer of the septum. (J and K) A gene reporter line co-expressing FERpro:FER-mCitrine with an mScarlet-labeled plasma membrane marker under the control of the P16 promoter confirms the broad expression pattern of FER and its general plasma membrane localization in epidermal cells of the septum (J) and the

whole funiculus (K). L shows the FER-mCitrine signal alone in K. f: funiculus; tt: transmitting track; o: ovule. Scale bars: 50  $\mu$ m.

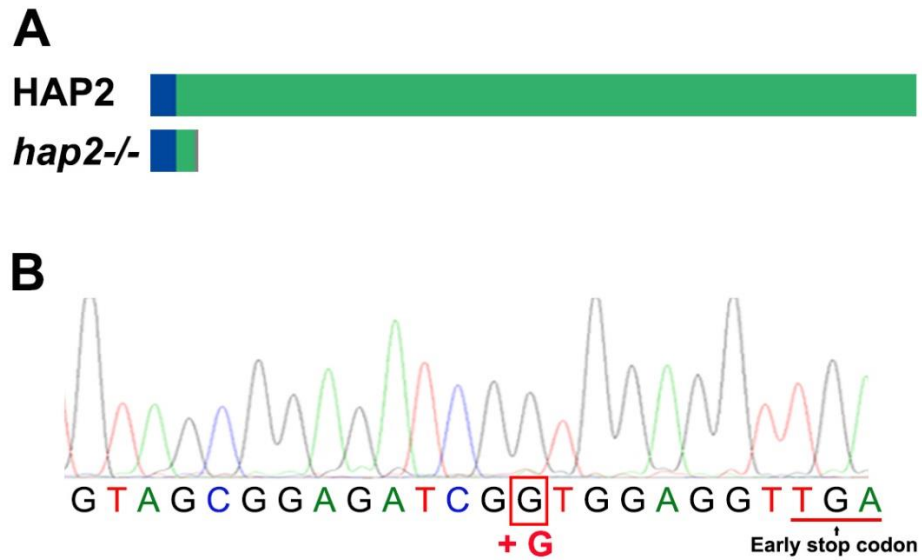

**Fig. S3. Mutation site leads to a loss-of-function *hap2*<sup>-/-</sup> mutation.**

(A) Schematic diagram of protein structure of wild-type HAP2 and that in mutated *hap2*<sup>-/-</sup>. Blue box, signal peptide; gray box, missense sequence due to frame shift mutation. (B) Sequencing result of the mutation site of HAP2 in the *hap2*<sup>-/-</sup> mutant. Red box indicates inserted base. Arrow indicates an early stop codon generated by an additional G.

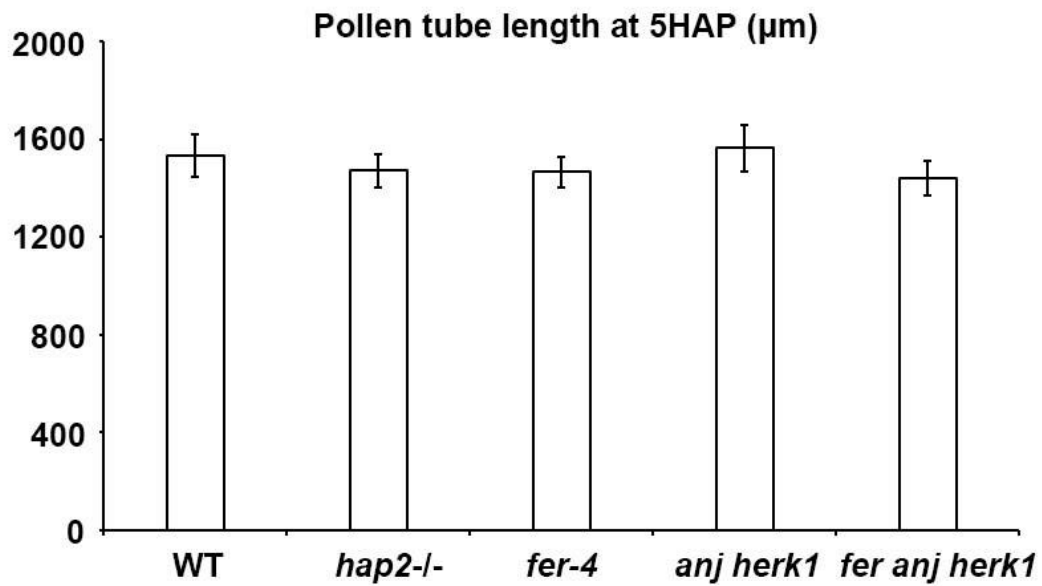

**Fig. S4. Pollen tube length in WT, *hap2*<sup>-/-</sup>, *fer-4*, *anj herk1* and *fer anj herk1* mutants.**

Statistical analysis of pollen tube length in WT pistils pollinated with WT or *hap2*<sup>-/-</sup> pollen, *fer-4*, *anj herk1* and *fer anj herk1* pistils pollinated with WT pollen at 5 HAP. The analysis was repeated for at least three times for this experiment. Data are mean values  $\pm$  SD.

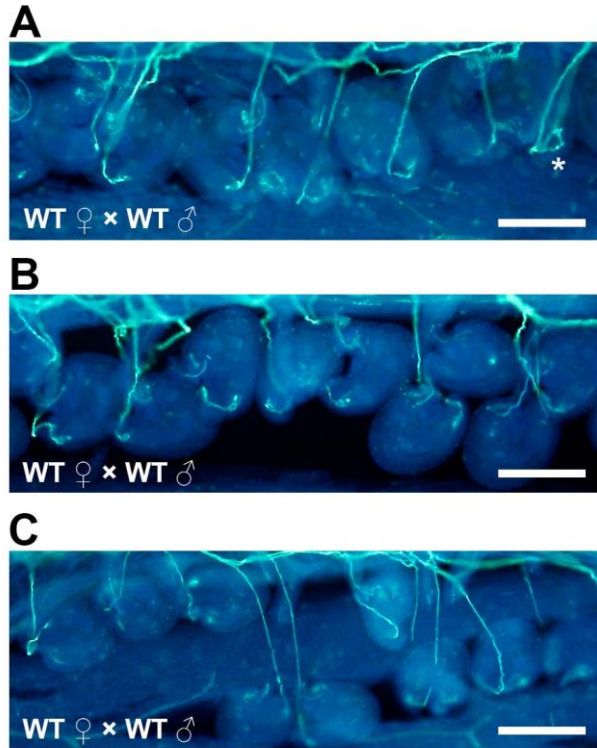

**Fig. S5. Aniline blue staining of pollen tube emergence in WT pistils at 5 HAP.**

(A). Representative image of pollen tube emergence in WT pistils. Image related to Figure 1C and 1D. (B). Representative image of pollen tube emergence in WT pistils. Image related to Figure 2D and 2E. (C). Representative image of pollen tube emergence in WT pistils. Image related to Figure 4F and 4G. Scale bars, 100  $\mu\text{m}$ .

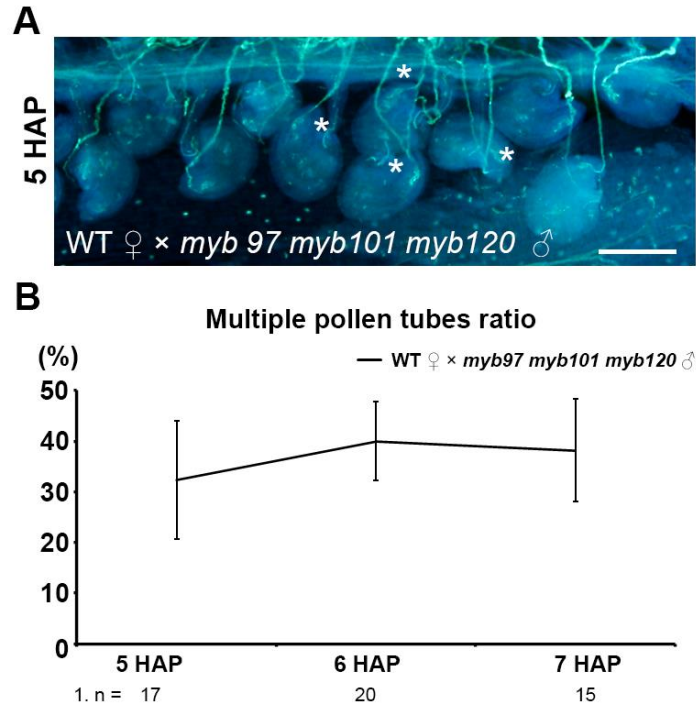

**Fig. S6. Analysis of multiple pollen tube emergence in the *myb97 myb101 myb120* triple mutant.**

(A) Aniline blue staining of multiple pollen tubes in the *myb97 myb101 myb120* mutant at 5 HAP. The analysis was repeated for at least three times for this experiment. (B) Statistical analysis of (A). White asterisks indicate ovules targeted by multiple pollen tubes. ‘n’ refers to the number of pistils. Data are mean values ± SD. Scale bar, 100 μm.

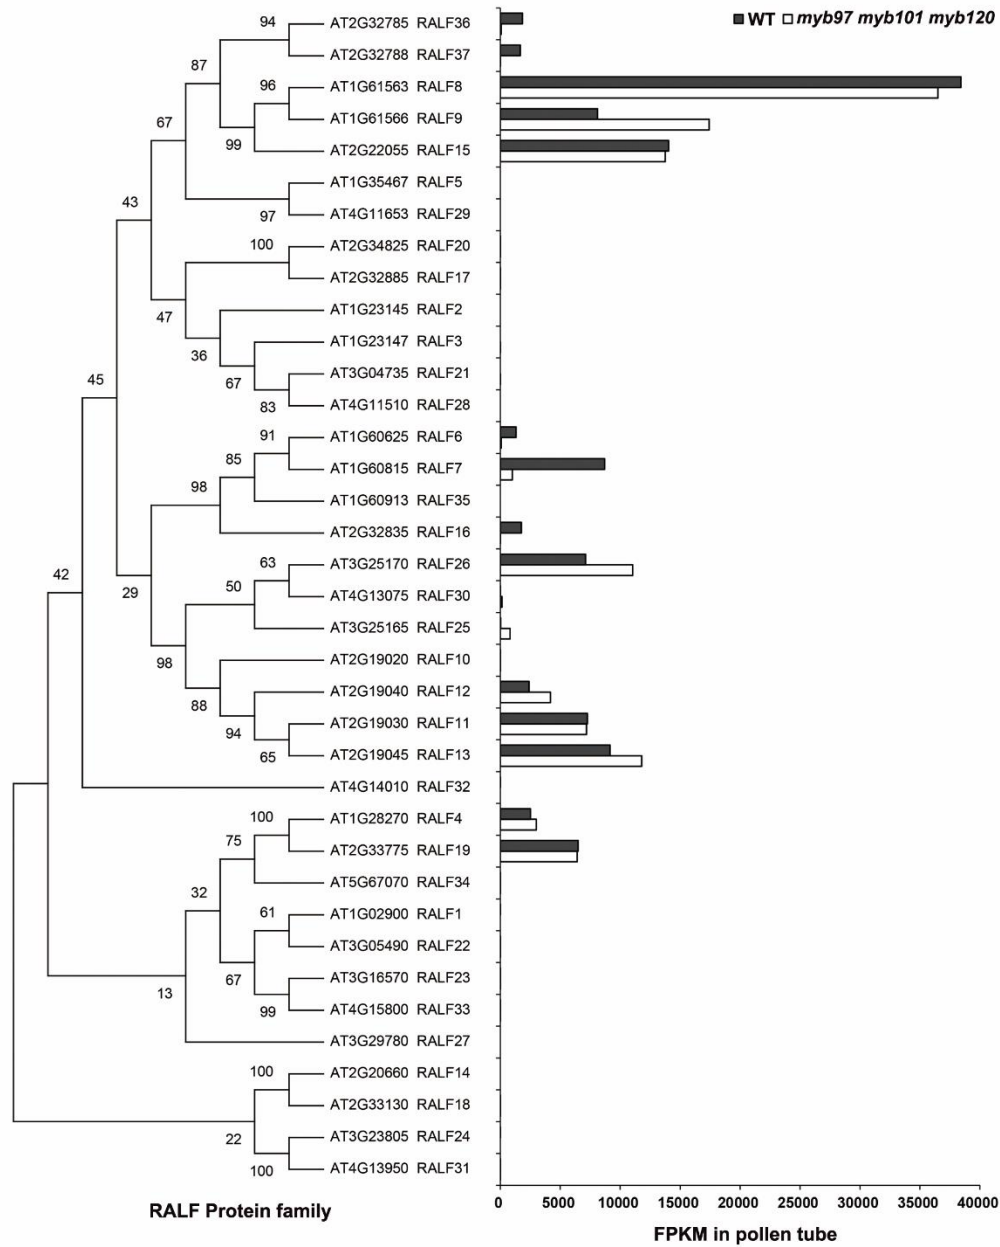

**Fig. S7. Gene expression analysis of *RALF* family members in the pollen tube.**

Relative expression levels of *RALFs* in semi-*in vivo* germinated pollen tube of wild type (WT) and *myb97 myb101 myb120* pollen tubes based on RNA-seq data. Phylogenetic tree based on full-length protein sequences indicates the relationship of the 37 members. Sequence alignment and bootstrap tree construction were conducted by MEGA-X, using ClustalW and Neighbor-Joining strategy respectively. FPKM: Fragments Per Kilobase per Million fragments mapped.

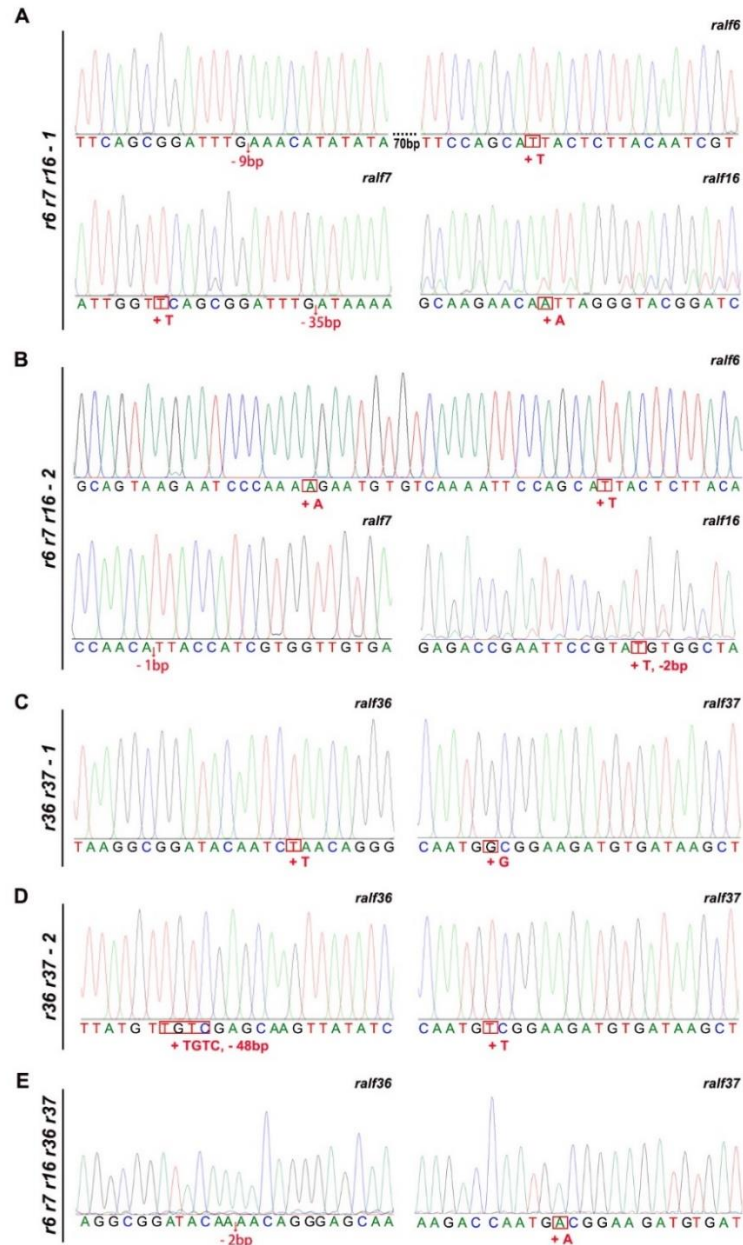

**Fig. S8. Mutation sites of *RALF6*, *RALF7*, *RALF16*, *RALF36* and *RALF37* in the *r6 r7 r16-1/-2* triple, *r36 r37-1/-2* double and *r6 r7 r16 r36 r37* quintuple mutants.**

(A and B) Sequencing result of the mutation sites of *RALF6* (two mutation sites), *RALF7* and *RALF16* in the *r6 r7 r16-1* (A) and *r6 r7 r16-2* (B) mutants, respectively. (C and D) Sequencing result of the mutation sites of *RALF36* and *RALF37* in the *r36 r37-1* (C) and *r36 r37-2* (D) mutants, respectively. (E) Sequencing result of the mutation sites of *RALF36* and *RALF37* in the *r6 r7 r16 r36 r37* mutant. The mutation sites of *RALF6*, *RALF7* and *RALF16* in the quintuple mutant are the same with those in the *r6 r7 r16-1* mutant. Red boxes indicate inserted bases and arrows deleted bases.



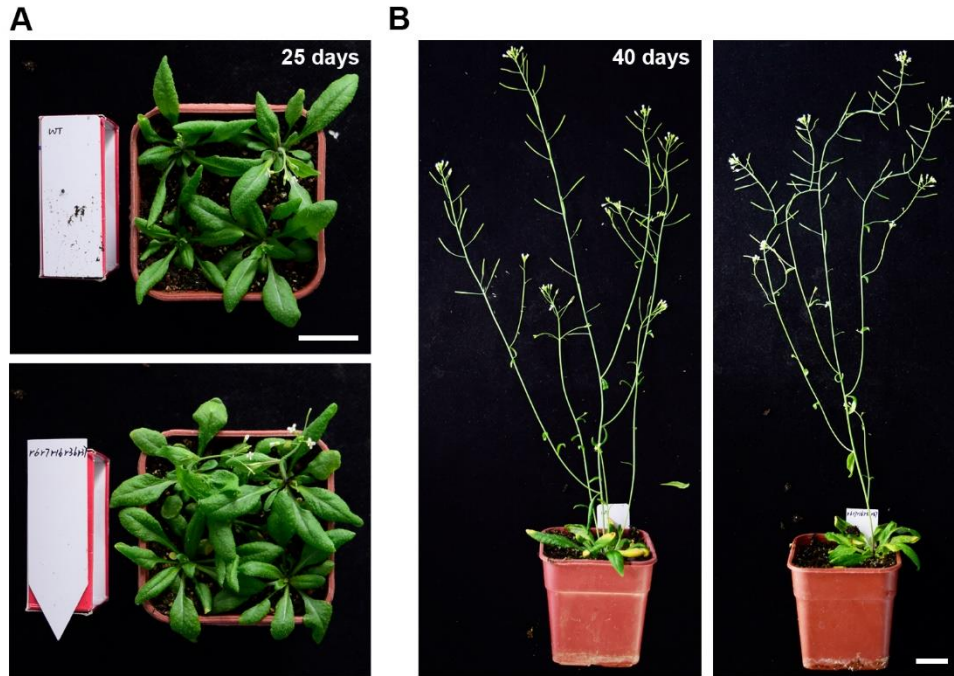

**Fig. S9. Images of whole WT plants and *r6 r7 r16 r36 r37* mutants.**

(A). 25-days-old grown wild-type (up) and *r6 r7 r16 r36 r37* (bottom) plants. Scale bar, 2.5 cm.

(B). 40-days-old grown wild-type (left) and *r6 r7 r16 r36 r37* (right) plants. Scale bar, 2.5 cm.

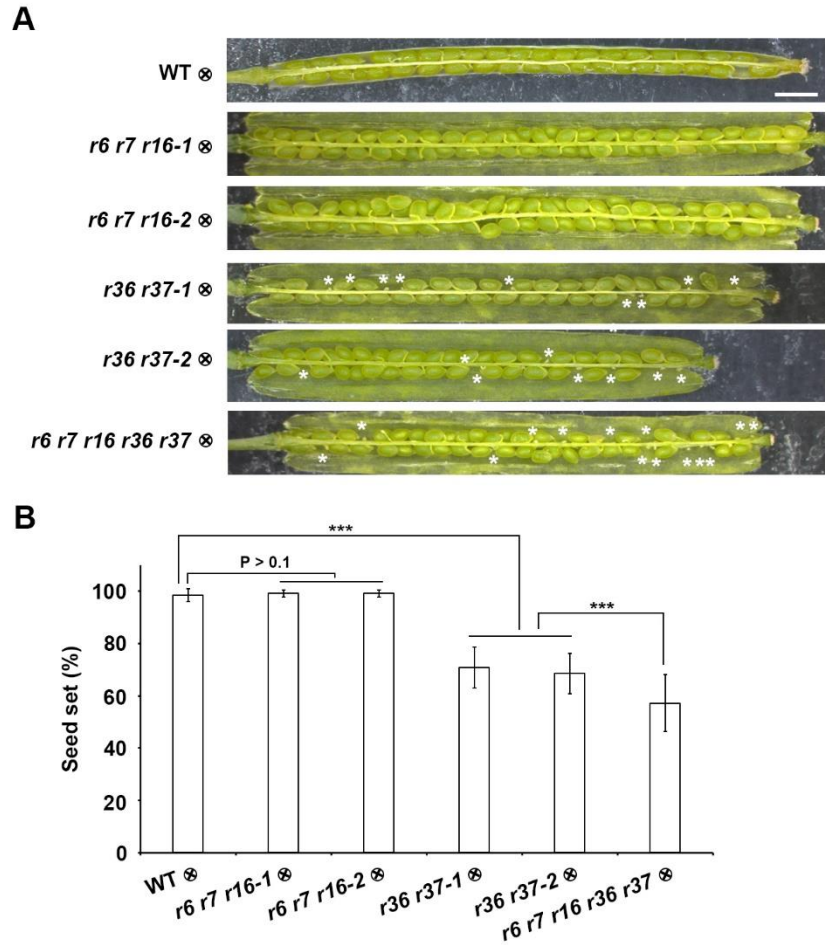

**Fig. S10. Fertility of WT, *r6 r7 r16-1/-2*, *r36 r37-1/-2* and *r6 r7 r16 r36 r37* mutant plants.**

(A) Silique of WT, *r6 r7 r16-1/-2*, *r36 r37-1/-2* and *r6 r7 r16 r36 r37* mutant plants. (B) Statistical analysis of (A). White asterisks indicate unfertilized ovules. Data are mean values  $\pm$  SD; \*\*\* shows  $P < 0.01$  (Student's *t* test). Scale bar, 1 mm.

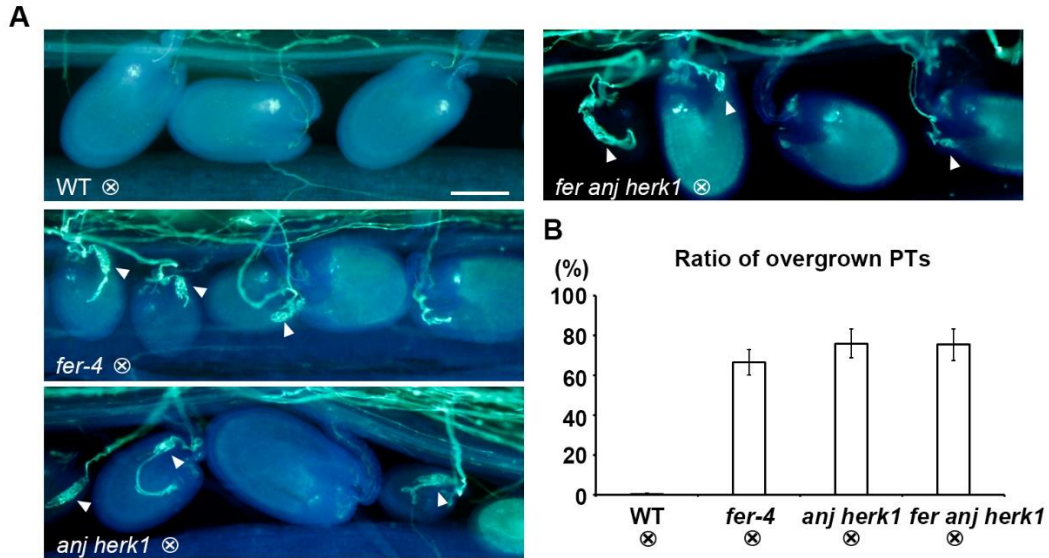

**Fig. S11. Analysis of overgrown pollen tubes in selfed WT, *fer-4*, *anj herk1* and *fer anj herk1* mutant ovules.**

(A) Aniline blue staining of overgrown pollen tubes in self-crossed WT, *fer-4*, *anj herk1* and *fer anj herk1* mutants at two days after anthesis. The analysis was repeated for at least three times for this experiment. Scale bar, 100  $\mu$ m. (B) Statistical analysis of (A). White arrowheads indicate ovules with overgrown pollen tubes. Data are mean values  $\pm$  SD.

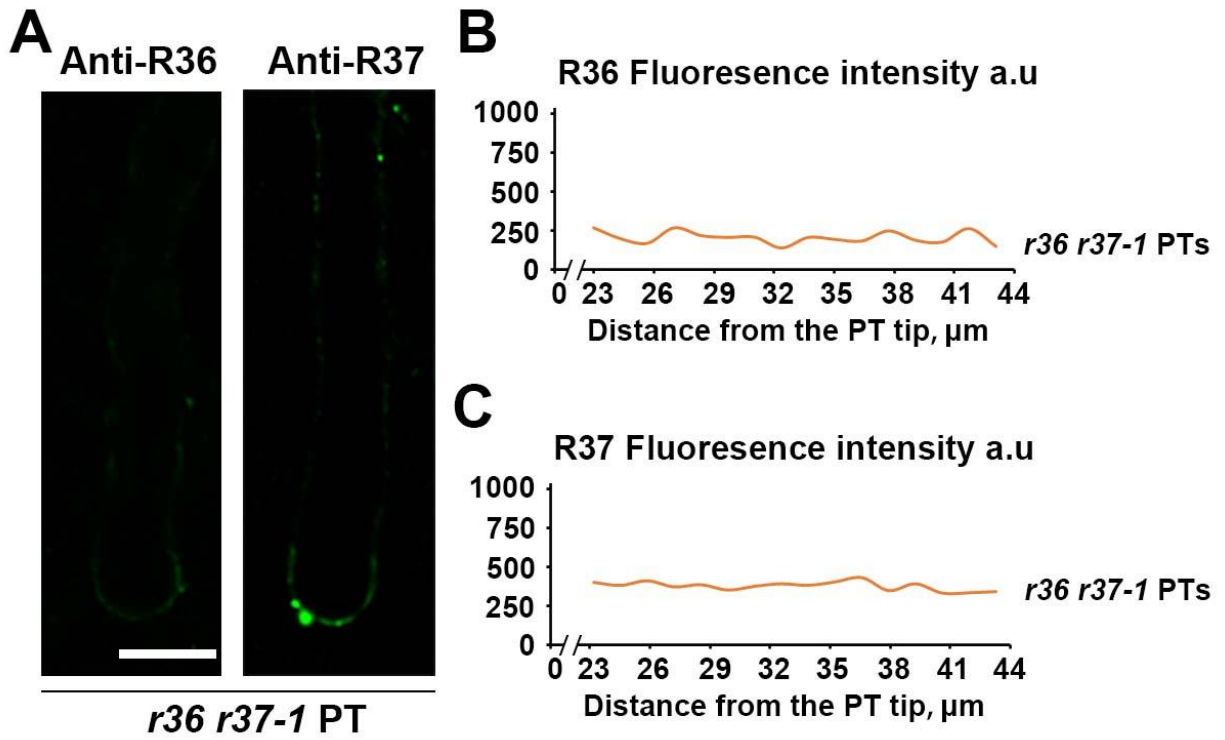

**Fig. S12. Immunofluorescence of RALF36 and RALF37 in *r36 r37-1* mutant pollen tubes.** (A) Immunofluorescence images of RALF36 and RALF37 in the *r36 r37-1* mutant. Scale bar, 10  $\mu\text{m}$ . (B and C) Statistical analysis of (A) (n=12 for anti-R36 and 15 for anti-R37). Data are mean values  $\pm$  SD.

**Table S1. Sequences used to build phylogenetic tree**

| <b>CrRLK1Ls</b> |                  |                                                                                                                                                                                                                                                                                                                                                                                                                                                                                                                                                                                                                                                                                                                                                                                                                                                                                                                                                                                                                                                      |
|-----------------|------------------|------------------------------------------------------------------------------------------------------------------------------------------------------------------------------------------------------------------------------------------------------------------------------------------------------------------------------------------------------------------------------------------------------------------------------------------------------------------------------------------------------------------------------------------------------------------------------------------------------------------------------------------------------------------------------------------------------------------------------------------------------------------------------------------------------------------------------------------------------------------------------------------------------------------------------------------------------------------------------------------------------------------------------------------------------|
| <b>Name</b>     | <b>Gene ID</b>   | <b>Sequence</b>                                                                                                                                                                                                                                                                                                                                                                                                                                                                                                                                                                                                                                                                                                                                                                                                                                                                                                                                                                                                                                      |
| <b>FER</b>      | <b>AT3G51550</b> | <p>MKITEGRFRLSLLLLLLLISAATLISAADYSPTEKILLNCGGGASNLTDTDNRI<br/> WISDVKSKFLSSSEDSKTSPALTQDPSVPEVPYMTARVFRSPFTYTFPVASG<br/> RKFVRLYFYPN SYDGLNATNSLFSVSFGPYTLLKNFSASQTAEALTYAFIIKE<br/> FVVNVEGGTLNMTFTPESAPSNA YAFVNGIEVTSMPDMSSTDGTLTMVGS<br/> SGSVTIDNSTALENVYRLNVGGNDISPSADTGLYRSWYDDQPYIFGAGLGIPE<br/> TADPNMTIKYPTGTPTYYAPVDVYSTARSMGPTAQINLNYNLTWIFSIDS GF<br/> TYLVRLHFCEVSSNITKINQRVFTIYLNNQTAEP EADVIAWTSSNGVPFHKDY<br/> VVNPPEGNGQQDLWLALHPNPVNKPEYYDSLLNGVEIFKMNTSDGNLAGT<br/> NPIPGPQVTADPSKVL RPTTRKSKSNTAIIAGAASGAVV LALIIGFCVFGAYRR<br/> RKRGDYQPASDATSGWLPLSLYGN SHSAGSAKTNTTGSYASSLPSNLCRHS<br/> FAEIK AATKNFDESRLVGVGGFGKVYRGEIDGGTTKVAIKRGNPMSEQGVH<br/> EFQTEIEMLSKLRHRHLVSLIGYCEENCEMILVYDYMAHGTMREHLYKTQN<br/> PSLPWKQRLEICIGAARGLHYLHTGAKHTIIHRDVKT TNILLDEKWWAKVSD<br/> FGLSKTGPTLDH THVSTVVKGSFGYLDPEYFRRQQLTEKSDVYSFGVVLFEA<br/> LCARPALNPTLAKEQVSLAEWAPYCYKKGMLDQIVDPY LKGKITPECFKKF<br/> AETAMKCVLDQGIERPSMGDVLWNLEFALQLQESAEENGKGVCGDMDMD<br/> EIKYDDGNCKGKNDKSSDVYEGNVTD SRSSGIDMSIGGRSLASESDGLTPS<br/> AVFSQIMNPKGR</p> |
| <b>THE1</b>     | <b>AT5G54380</b> | <p>MVFTKSLLVLLWFLSCYTTTTSSALFNPPDNYLISCGSSQNITFQNRIFVPDSL<br/> HSSLVLKIGNSSVATSTTSNNSTNSIYQTARVFSSLAS YRFKITS LGRHWIRLH<br/> FSPINNSTWNLTASITVVTEDFVLLNNFSFNNFNGSYIFKEYTVNVTSEFLT<br/> SFIPSNNSVVFVNAIEVVSVPDNLIPDQALALNPSTPFSGLSLLAFETVYRLNM<br/> GGPLLTSQNDTLGRQWDNDAEYLHVNSSVLVVTANPSSIKYSPSVTQETAP<br/> NMVYATADTMGDANVASPSFNVTWVLPVDPDFRYFVRVHFCDIVSQALNT<br/> LVFNLYVNDDLALGSLDLSTLTNGLKVPYFKDFISNGSVESGVLTVSVGPD<br/> SQADITNATMNGLEV LKISNEAKSLSGVSSVKSLLPGGSGSKSKKKAVIIGSL<br/> VGAVTLILLIAVCCYCCLVASRKQRSTSPQEGGNHGPWLPLPLYGLSQT LTK<br/> STASHKSATASCISLASTHLGRCFMFQEIMDATNKFDESSLLGVGGFGRVYK<br/> GTLEDGTKVAVKRG NPRSEQMAEFRT EIEMLSKLRHRHLVSLIGYCDERSE<br/> MILVYEYMANGPLRSHLYGADLPPLSWKQRLEICIGAARGLHYLHTGASQSI<br/> IHRDVKT TNILLDENLVAKVADFGLSKTGPSLDQTHVSTAVKGSFGYLDPEY<br/> FRRQQLTEKSDVYSFGVVLMEVLCR PALNPVLPREQVNIAEWAMAWQKK<br/> GLLDQIMDSNLTGKVN PASLKKFGETAEKCLAEYGVDRPSMGDVLWNLEY<br/> ALQLEETSSALMEPDDNSTNHIPGIPMAPMEPFDNSMSIIDRGGVNSGTGTDD<br/> DAEDATTS AVFSQLVHPRGR</p>                                                  |

|              |                  |                                                                                                                                                                                                                                                                                                                                                                                                                                                                                                                                                                                                                                                                                                                                                                                                                                                                                                                                                                                                                            |
|--------------|------------------|----------------------------------------------------------------------------------------------------------------------------------------------------------------------------------------------------------------------------------------------------------------------------------------------------------------------------------------------------------------------------------------------------------------------------------------------------------------------------------------------------------------------------------------------------------------------------------------------------------------------------------------------------------------------------------------------------------------------------------------------------------------------------------------------------------------------------------------------------------------------------------------------------------------------------------------------------------------------------------------------------------------------------|
|              | <b>AT5G24010</b> | <p>MAFPINLTQTLLFFFCPLLHLSFAAFTPTDNYLINS GSNTNTSFFTTTRSFLSDSS<br/> EPGSSFLSTDRSISISDTNPSDPSVLYNTARVFPVGGSYKFQVTTKGTHFIRL<br/> HFAPFKASRFNLRSAKFRVLINGFSVINSFSTSSVVVKEFILKIDDPVLEISFLPF<br/> KASGFGFVNAVEVFSAPKDYIMDQGTCLVIPNSAQIFSNLSSQVLETVHRINV<br/> GGSKLTPFNDTLWRTWVDDNYLLLRAAARRAWTTHSPNYQNGGATREIA<br/> PDNVYMTAQEMDRDNQELQARFNISWGFQVDEKRVLHLVRLHFCDIVSSSL<br/> NQLYFNVFINEYLAFKDVLDLSTLTFHVLASPLYIDFVAESDRSGMLRISVGPS<br/> DLSNPARVNALLNGVEIMRILSPVSSEVVSGKRNVVWIVVGSVLGGFVFLSL<br/> FFLSVLCLCRRKNNKTRSSSESTGWTPLRRFRGSSNSRRTTERTVSSSGYHTLRI<br/> SFAELQSGTNNFDRSLVIGVGGFGMVFRGSLKDNTKVAVKRGSPPSRQGLP<br/> EFLSEITILSKIRHRHLVSLVGYCEEQSEMILVYEMDKGPLKSHLYGSTNPP<br/> SWKQRLEVCIGAARGLHYLHTGSSQGIHRDIKSTNILLDNNYVAKVADFGL<br/> SRSGPCIDETHVSTGVKGSFGYLDPEYFRRQQLTDKSDVYSFGVLLFEVLC<br/> RPAVDPLLVREQVNLAEWAIEWQRKGM LDQIVDPNIADEIKPCSLLKFAETA<br/> EKCCADYGVDRPTIGDVLWNLEHVLQLQESGPLNIPEEDYGDVTDPRARQ<br/> GLSNGSNIERDYGDGTSGIISSTQVFSQLMTNAGR</p>                                                                   |
| <b>BUPS1</b> | <b>AT4G39110</b> | <p>MEIRKKPNIFTVLVIDFSSKPSMALLAILLFLSGPSASAVAAA VGPATGFKP<br/> ADDILIDCGSKSSSKTPDGRVFKSDQETIQYIEAKEDIQVSAPPSDKVASPIYL<br/> TARIFREEATYKFHLTRPGWHWVRLHFLAFPNDKFDLQQATFSVLTEKYVL<br/> LHNFKISNNNND SQA AVQKEYLVNMTDAQFALRFRPMKSSAAFINAIEVVS<br/> APDELISDSGTALFPVIGFSGLSDYAYQSVYRVNVGGPLIMPQNDTLGRTWIP<br/> DKEFLK DENLAKDVKTTPSAIKYPPEVTPLIAPQTVYATAVEMANSLTIDPNF<br/> NVSWNFPSNPSFNYLIRLHFCDIVSKSLNDLYFN VYINGKTAISGLDLSTVAG<br/> NLAAPYYKDIVVNATLMGPELQVQIGPMGEDTGTKNAILNGVEVLKMSNSV<br/> NSLDGEGFVDGRTTGMGKHGMVATAGFVMMFGAFI GLGAMVYKWKKR<br/> QDWQKRNSFSSWLLPIHAGDSTFMTSKGGSQKSNFYNSTLGLGRYFSLSELQ<br/> EATKNFEASQIIGVGGFGNVYIGTLDDGTKVAVKRGNPQSEQGITEFQTEIQ<br/> MLSKLRHRHLVSLIGYCDENSEMILVYEFMSNGPFRDHLYGKNLAPL TWKQ<br/> RLEICIGSARGLHYLHTGTAQGIHRDVKSTNILLDEALVAKVADFGLSKDVA<br/> FGQNHVSTAVKGSFGYLDPEYFRRQQLTDKSDVYSFGVLLLEALCARPAINP<br/> QLPREQVNLAEWAMQWKRKGLLEKIIDPHLAGTINPESMKKFAEAAEKCLE<br/> DYGVD RPTMGDVLWNLEYALQLQEAF TQGKAEETENAKPDVVTPGSVPVS<br/> DPSPITPSVTTNEAATVPVPAKVEENSGTAVDEHSGTAMFTQFANLNGR</p> |

|                    |                         |                                                                                                                                                                                                                                                                                                                                                                                                                                                                                                                                                                                                                                                                                                                                                                                                                                                                                                                                                                                                      |
|--------------------|-------------------------|------------------------------------------------------------------------------------------------------------------------------------------------------------------------------------------------------------------------------------------------------------------------------------------------------------------------------------------------------------------------------------------------------------------------------------------------------------------------------------------------------------------------------------------------------------------------------------------------------------------------------------------------------------------------------------------------------------------------------------------------------------------------------------------------------------------------------------------------------------------------------------------------------------------------------------------------------------------------------------------------------|
| <p><b>CVY1</b></p> | <p><b>AT2G39360</b></p> | <p>MINLKLFLLELKLCFLITLLCSSHSSVSDFINCGSPTNVTVNNRRTFVSDNNL<br/> VQGFSVGTTDSSNSGDESTLFQTARVFSDESSSTYRFPPIEEHGWFLIRIYFLPLV<br/> SASQDLTTARFSVSAQNFTLIREYKPSTTSVVREYILNVTTDSLQFLPRTGS<br/> VSFINALEVLRLPETLIPEDAKLIGTQKDLKLSHAMETVSRVNMGNLSVSRD<br/> QDKLWRQWSDSDAYKAHFGTPVMNLKAVNFSAGGITDDIAPVYVYGTATR<br/> LNSDLDPNTNANLWTFKVEPGFDYFVRFHFCNIIVDPFGFERQIRFDIFVNSE<br/> KVRTIDMTEVLNGTFGAPFFVDAVMRKAKSREGFLNLSIGLVMDVSSYPVS<br/> FINGFEISKLSNDKRS LDAFDAILPDGSSSNKSSNTSVGLIAGLSAALCVLAFV<br/> GVVVSWWCIRKRRRRNRQMOTVHSRGDDHQIKKNETGESLIFSSSKIGYRY<br/> PLALIKEATDDFDESLVIGVGGFGKVYKGVLRDKTEVAVKRGAPQSRQGLA<br/> EFKTEVEMLTQFRHRHLVSLIGYCDENSEMIIVYEYMEKGTLKDHLYDLDD<br/> KPRLSWRQRLEICVGAARGLHYLHTGSTRAIHRDVKSANILLDDNFMAKVA<br/> DFGLSKTGPDLQTHVSTAVKGSFGYLDPEYLTRQQLTEKSDVYSFGVVML<br/> EVVCGRPVIDPSLPREKVNLI EWAMKLVKKGKLEDIIDPFLVGKVKLEEVKK<br/> YCEVTEKCLSQNGIERPAMGDLLWNLEFMLQVQAKDEKAAMVDDKPEASV<br/> VGSTMQFSVNGVGDIAGVSMKVF AQMVREETR</p>                                                        |
| <p><b>ANX2</b></p> | <p><b>AT5G28680</b></p> | <p>MNEKLRILFSFLCFFYVLLVSPSQSNGQDISLSCGASEPAVDQDKKKWEPDT<br/> KFLKTPNTVHAPATYQDPSLLSTVPYMTSRIFTAPATYEIPVKGDKRHMLRL<br/> HFYPSYTG LNILDSYFVAANDLTLLSNFSAAITCQALTQAYLVREYSLAPS<br/> EKDVL SIIFTPSDKHPKAFAFINGIEVIPPELFD TASLVGFSDQTS DTKTANL<br/> QTMFRLNVGGQDIPGSQDSGGLTRTWYNDAPYIFSAGLGVTLQASNNFRID<br/> YQKMPVSTAPADVYKTARSQGPNGDINMKSNTW MFQVD TNFTYIMRLHF<br/> CEFQLAKINQKVFNIFINNRTAQGDTNPADILGWTGGKGIPTYKDYAIYVDA<br/> NTGGGGEEISLQMPSTFGQPEYYDSQLNGLEIFKIDTMKNLAGPNPKPSM<br/> QANEDVKKDFQGDKRITAFVIGSAGGVA AVLFCALCFTMYQRKRKFSGSDS<br/> HTSSWLPIYGNSHTSATKSTISGKSNNGSHLSNLAAGLCRRFSLSEIKHGTHN<br/> FDESNVIGVGGFGKVYKGVIDGGTKVAIKKSNPNSEQGLNEFETEIELLSRLR<br/> HKHLVSLIGYCDEGGEMCLIYDYMSLGTREHLYNTKRPQLTWKRRLEIAIG<br/> AARGLHYLHTGAKYTIHRDVKT TNILLDENWVAKVSDFGLSKTGPNMNGG<br/> HVTTVVKGSFGYLDPEYFRRQQLTEKSDVYSFGVVLFEVLCARPALNPSLSK<br/> EQVSLGDWAMNCKRKG TLEDIIDPNLKGKINPECLKKFADTA EKCLSDSGL<br/> DRPTMGDVLWNLEFALQLQETADGSRHRTPSNGGGSVDLGGGGGGVTVNI<br/> SAGESDLGDDL SSEENSGIFSQIVNPKGR</p> |

|              |                  |                                                                                                                                                                                                                                                                                                                                                                                                                                                                                                                                                                                                                                                                                                                                                                                                                                                                                                                                                             |
|--------------|------------------|-------------------------------------------------------------------------------------------------------------------------------------------------------------------------------------------------------------------------------------------------------------------------------------------------------------------------------------------------------------------------------------------------------------------------------------------------------------------------------------------------------------------------------------------------------------------------------------------------------------------------------------------------------------------------------------------------------------------------------------------------------------------------------------------------------------------------------------------------------------------------------------------------------------------------------------------------------------|
| <b>HERK1</b> | <b>AT3G46290</b> | <p>MGIEKFETFILISTISILLCICHGFTPVDNYLINC GSPTNGTLMGRIFLSDKLSK<br/> LLTSSKEILASVGGNSGSDIYHTARVFTEVSSYKFSVTRGRHWVRLYFNPF<br/> YQNFKMGS AKFAVSSQSHVLLSDFTVTSSKVKEYSLNVTTNDLVLTFTPSS<br/> GSFAFVNAIEVISIPDTLITGSPRFVGNPAQFPDMSMQGLETIHRVNMGGPLV<br/> ASNNDTLTRTWVPDSEFLLEKNLAKSMSKFSTVNFVPGYATEDSAPRTVYG<br/> SCTEMNSADNPNSIFNVTWEFDVDPGFQYYFRFHFCDIVSLNQLYFNLYV<br/> DSMVAATDIDLSTLVDNTLAGAYSMDFTVTPKGSNKVRSIGPSTVHTDY<br/> PNAIVNGLEIMKMNNSKGQLSTGTVPVPGSSSSSSKSNLGLIVGSAIGSLLAVV<br/> LGSCFVLYKKRKRQDGHSTWMPFSINGTSMGSKYSNGTTLSITTNANY<br/> RIPFAAVKDATNNFDESRNIGVGGFGKVYKGELNDGTVAVKRGPNPKSQ<br/> GLAEFRTEIEMLSQFRHRHLVSLIGYCDENNEMILYIYEMENGTVKSHLYGS<br/> GLPSLTWKQRLEICIGAARGLHYLHTGDSKPVHRDVKSANILLDENFMAKV<br/> ADFGLSKTGPELDQTHVSTAVKGSFGYLDPEYFRRQQLTDKSDVYSFGVVL<br/> FEVLCARPVIDPTLPREMVNLAEWAMKWQKKGQLDQIIDQSLRGNIRPDSL<br/> KFAETGEKCLADYGVDRPSMGDVLWNLEYALQLQEAVIDGEPEDNSTNMI<br/> GELPPQINNFSQGDTSVNVPGTAGRFEESSIDDLSGVSMKVFSQLVKSEGR</p>        |
| <b>ANJEA</b> | <b>AT5G59700</b> | <p>MGGEKFGFLIWILSIPCLIFLCYGYVPVDNYLINC GSSTNVTVTSRVFISDNLA<br/> SNFLTSPNEILAAASNRNSNSDIYQTARIFTGISKYRFSVARGRHWIRLHFNPFQ<br/> YQNFQMVSAKFSVSSETHVLLSDFTVSSRVMKEYSLNVATDHLELTFTPSGD<br/> SFAFLNALEVVSVPDTLFSGDPSFAGSPGKFQGLSWQALETVYRVNMGGPR<br/> VTPSNDTLSRIWEPDSEFLVEKNLVKSVSKIASVDYVPGFATEETAPRTVYGT<br/> CTEMNSADNPSSNFNVTWDFDVPDGFQYFLRFHFCDIVSKALNQLYFNLYV<br/> DSMDVVENLDLSSYLSNTLSGAYAMDFVTGSAKLTKRIRVSIGRSSVHTDYP<br/> TAILNGLEIMKMNNSKSQLSIGTFLPSGSSSTTKKNVGMIIGLTIGSLLALVVL<br/> GGFFVLYKKRGRDQDGNKTIWIPSSNGTTSSSNGTTLASIASNSSYRIPLVA<br/> VKEATNSFDENRAIGVGGFGKVYKGELHDGTVAVKRANPKSQGLAEFR<br/> TEIEMLSQFRHRHLVSLIGYCDENNEMILVYIYEMENGTLSHLYGSGLLSLS<br/> WKQRLEICIGSARGLHYLHTGDAKPVHRDVKSANILLDENLMAKVADFGL<br/> SKTGPEIDQTHVSTAVKGSFGYLDPEYFRRQQLTEKSDVYSFGVVMFEVLC<br/> ARPVIDPTLTREMVNLAEWAMKWQKKGQLEHIIDPSLRGKIRPDSLRFKGET<br/> GEKCLADYGVDRPSMGDVLWNLEYALQLQEAVVDGDPEDSTNMIGELPLR<br/> FNDYNHGDTSVNFSVAKEGRFDEEESSVDDSSGVSMKVFSQLIKSEGR</p> |



|              |                  |                                                                                                                                                                                                                                                                                                                                                                                                                                                                                                                                                                                                                                                                                                                                                                                                                                                                                                                                                                                                            |
|--------------|------------------|------------------------------------------------------------------------------------------------------------------------------------------------------------------------------------------------------------------------------------------------------------------------------------------------------------------------------------------------------------------------------------------------------------------------------------------------------------------------------------------------------------------------------------------------------------------------------------------------------------------------------------------------------------------------------------------------------------------------------------------------------------------------------------------------------------------------------------------------------------------------------------------------------------------------------------------------------------------------------------------------------------|
|              | <b>AT2G23200</b> | <p>MENFCFQDSVSLFITIMVLVLLPRLSLSDTSTYTRPENFYVNCGSDSNVFGG<br/> QTFVGDTSSTNSVSFTNKGTEVINDQSSVAPEIYRTVRIFRHPSSYKFKLDSL<br/> GLHFVRLHFSVVFSRADLLTARFTVSATSGSNHHLKSFSPQNLNTNTPRVEEFL<br/> LMMNSLEFEIRFVPDHSSLALINAIEVFSAPDDLEIPSASDKNLHTIYRLNVGG<br/> EKITPDNDTLGRTWLPDDDDFLYRKDSARNINSTQTPNYVGGSSATDSTAP<br/> DFVYKTAKAMNRSSNEQVGMLMNVTWFSFKVKSNIHRHFIRIHFSIDILSNLSN<br/> SDSDFYLFVNGYWRVDVKPSEQPRLASPFKDVVNVSDGSGLLNISIGTKEA<br/> NKDAGFLNGLEMMEVLSKSGSDYSNRSSSRVHIITGCAVAAAAASALVFSLL<br/> FMVFLKRRRSKKTKEVEGTVWSPLPLHRGGSSDNRPIQYHNSPLRNLHLG<br/> LTIPFTDILSATNDFEQLLIGKGGFGYVYKAILPDGTAAIKRGKTGSGQGIL<br/> EFQTEIQVLSRIRHRHLVSLTGYCEENSEMILVYEFMEKGTLKEHLYGSNLPS<br/> LTWKQRLEICIGAARGLDYHSSGSEGAIHRDVKSTNILLDEHNIKVAADFG<br/> LSKIHNQDESINIKGTFGYLDPEYLQTHKLTEKSDVYAFGVVLELVFAR<br/> PAIDPYLPHEEVNLSEWVMFCKSKGTIDEILDPSLIGQIETNSLKKFMEIAEK<br/> LKEYGDERPSMRDVIWDLEYVLQQLQMMTNRREAHEEDSTAINSGGSLVAPR<br/> LMVSDSFSTNSIFQNGDESKNRFGFTDSSETRVFSQLKISDAR</p>                                                  |
| <b>BUPS2</b> | <b>AT2G21480</b> | <p>MEIRKKPNIPMCLVLDSSSRPFMTLLFTILLFLTGLASAVGAVGGSPTAGFKP<br/> ADDILIDCGSKSSTKTPEGRVFKSDSETVQYIEAKDDIQVSAPPSDKLPSPYIL<br/> TAKIFREEAIYKFHLTRPGWHWVRLHFFAFPNDKFDLQQATFSVLTEKYVLL<br/> HNFKLSNDNNSQATVQKEYLLNMTDAQFALRFKPMKGSAAFINGIELVSA<br/> PDELISDAGTSLFPVNGFSGLSDYAYQSVYRVNVGGPLITPQNDTLGRTWTP<br/> DKEYLKDENLAKDVKTNPATAIYPPGVTPLIAPQTVYATGAEMADSQTIDPN<br/> FNVTWNFSPNPSFHYFIRLHFCDIISKSLNDLYFNYYINGKTAISGLDLSTVAG<br/> DLSAPYYKDIVVNSTLMTSELQVQIGPMGEDTGKKNAILNGVEVLKMSNSV<br/> NSLDGEFGVDGQRASMGKQGMVATAGFVMMFGAFVGLGAMVYKWKKRP<br/> QDWQKRNSFSSWLLPIHAGDSTFMTSKTGSHKSNLYNSALGLGRYFSLSELQ<br/> EVTKNFDASEIIGVGGFGNVYIGTIDDGTQVAIKRGNPQSEQGITEFHTEIQML<br/> SKLRHRHLVSLIGYCDENAEMILVYEYMSNGPFRDHLYGKNLSPLTWKQRL<br/> EICIGAARGLHYLHTGTAQGIHRDVKSTNILLDEALVAKVADFGLSKDVAF<br/> GQNHVSTAVKGSFGYLDPEYFRRQQLTDKSDVYSFGVVLEALCARPAINP<br/> QLPREQVNLAEWAMLWKQKGLLEKIIDPHLVGAVNPESMKKFAEAAEKCL<br/> ADYGVDPRPTMGDVLWNLEYALQLQEAFSQGKAEAEVETPKPVAVPAAAP<br/> TSPAATTAASERPVSQTEEKDDSTVDQHSGMTMFTQFASLNGR</p> |

|              |                  |                                                                                                                                                                                                                                                                                                                                                                                                                                                                                                                                                                                                                                                                                                                                                                                                                                                                                                                                                                                             |
|--------------|------------------|---------------------------------------------------------------------------------------------------------------------------------------------------------------------------------------------------------------------------------------------------------------------------------------------------------------------------------------------------------------------------------------------------------------------------------------------------------------------------------------------------------------------------------------------------------------------------------------------------------------------------------------------------------------------------------------------------------------------------------------------------------------------------------------------------------------------------------------------------------------------------------------------------------------------------------------------------------------------------------------------|
| <b>HERK2</b> | <b>AT1G30570</b> | <p>MSKLRKKYLEHLLCVLIFFTYVIGYGEAQSKSFLVDCGSNATTEVDGRTWV<br/> GDLSPNKSVTLQGFDAITASTSKGSSVYAEIYKTARVFDAVLNYTFEGITQG<br/> NYFVRLHFSPFAIENHNVNNESSFSVFADGLRLMLDINIAGEIAHKNLILESTGH<br/> NATASSLVKEFLLPTGPGKLVLSFIPEKGSFGFVNAIEIVSVDDKLFKESVTKV<br/> GGSEVELGLGGRGIETMYRLNVGGPKLGPSKDLKLYRTWETDLSYMWIENA<br/> GVEVKNSSNITYALADDSPVAPLLVYETARMMSNTEVLEKRFNISWKFEVD<br/> PNFDYLVRLHFCELLVDKQNRIFRIYINNQTAAGNFDIFAHAGGKNKGIYQ<br/> DYLDPVSSKNDVLWQLGPDSSVGASGDALLSGLEIFKLSKNGNLAHLIRFDS<br/> TGHSVSDSKMRIIWISVGAGIAIIFFVFLGILVVCLCKRRRSKSDSKNNPPG<br/> WRPLFLHVNNSTANAKATGGSLRLNTLAASTMGRKFTLAEIRAATKNFDDG<br/> LAIGVGGFGKVYRGELEDGTLIAIKRATPHSQQGLAEFETEIVMLSRLRHRHL<br/> VSLIGFCDEHNEMILVYEYMANGLRSHLFGSNLPLSWKQRLEACIGSARG<br/> LHYLHTGSEGGIIHRDVKTTNILLDENFVAKMSDFGLSKAGPSMDHTHVSTA<br/> VKGSGFYLDPEYFRRQQLTEKSDVYSFGVVLFEAVCARAVINPTLPKDQINL<br/> AEWALS WQKQRNLESIIDSNLRGNYSPEKLEKYGEIAEKCLADEGKNRPM<br/> GEVLWSLEYVLQIHEAWLRKQNGENSFSSSQAVEEAPESFTLPACSNQDSSE<br/> TEQSQTGSALHNSA</p>         |
| <b>ANX1</b>  | <b>AT3G04690</b> | <p>MSGKTRILFFLTCLSFLLVFPTRSNGQDLALSCGTSEASADQDKKKWEPDTK<br/> FLKTGNSIHATATYQDPSLLSTVPYMTARIFTAPATYEIPIKGDKRHLLRLYF<br/> YPSTYTGLNISNSYFTVEANDVTLLSNFSAAITCQALTQAYLVKEYSLAPTDK<br/> DVLSIKFTPSDKYRDAFAFINGIEVIQMPELFDTAALVGFTDQTMDAKTANL<br/> QSMFRLNVGGQDIPGSQDSGGLTRTWYNDAPYIFSAGLGVTLQASNNFRINY<br/> QNMPVSIAPADIYKTARSQGPNGDINLKSNTWWMFQIDKNFTYILRLHFCEFQ<br/> LSKINQKVFNIYINNRTAQADTTPADIIGWTGEKGIPMYKDYAIYVDANNGG<br/> EEITLQMTPTSTFGQPEYYDSSLNGLEIFKMDTMKNLAGPNPEPSPMQAEDEV<br/> KKEFKNEKRHAFIIGSAGGVLA VLIGALCFTAYKKKQGYQGGDSHTSSWLP<br/> YGNSTTSGTKSTISGKSNNNGSHLSNLAAGLCRRFSLPEIKHGTQNFDDSNVIG<br/> VGGFGKVYKGVIDGTTKVAVKKSNPNSEQGLNEFETEIELLSRLRHKHLVSL<br/> IGYCDEGGEMCLVYDYMAFGTLREHL YNTKKPQLTWKRRLEIAIGAARGLH<br/> YLHTGAKYTIHRDVKTTNILDENWVAKVSDFGLSKTGPNMNGGHVTTV<br/> VKGSGFYLDPEYFRRQQLTEKSDVYSFGVVLFEILCARPALNPSLPKEQVSL<br/> GDWAMNCKRKGNLEDIIDPNLKGKINAECLEKFFADTAEKCLNDSGLERPTM<br/> GDVLWNLEFALQLQETADGTRHRTPNNGGSSSEDLGRGGMAVNVAGRDDV<br/> SDLSSDNTEIFSQIVNPKGR</p> |

|                    |                         |                                                                                                                                                                                                                                                                                                                                                                                                                                                                                                                                                                                                                                                                                                                                                                                                                                                                                                                                                                                                                                |
|--------------------|-------------------------|--------------------------------------------------------------------------------------------------------------------------------------------------------------------------------------------------------------------------------------------------------------------------------------------------------------------------------------------------------------------------------------------------------------------------------------------------------------------------------------------------------------------------------------------------------------------------------------------------------------------------------------------------------------------------------------------------------------------------------------------------------------------------------------------------------------------------------------------------------------------------------------------------------------------------------------------------------------------------------------------------------------------------------|
| <p><b>CAP1</b></p> | <p><b>AT5G61350</b></p> | <p>MGGDFRHFSSHVSLLLLFLIVKSSSSFTPADNYLIDCGSSDETCLSDGRNFKS<br/> DQQSVAFLQTDEDIKTSVDSIPITDSNASTLPLYL TARIFAGKSTYSFYISRPGR<br/> HWIRLHFYPLNHPLYNL TNSVFSVTTD TT VLLHDFSAGDTSSIVFKEYLIYAA<br/> EKLSLYFKPHKGSTAFINA VEIVSVPDEL VPDSASSVPQAPDFKGLSSFSLEIL<br/> HRINIGDLISPKIDPLSRTWLS DKPYNTFPEGSRNVTVD PSTITYPDGGATAL<br/> IAPNPVYATAEEMADAQTSQPNFNLSWRMSVDFGHDYFIRLHFCDIVSKSLN<br/> DLIFNVFINKLSAISALDSSLTSALGTAYYAD FVLNASTITNGSILVQVGTP<br/> NLQSGKPNAILNGLEIMKLNNAAGSLDGLFGVDGKYKGP IGGMSSKKLAIA<br/> GIGFVMALTAFLGVVLLVRWQRRPKDWQKQNSFSSWLLPLHASHSSYISS<br/> KGGSTSRMSIFGSKKSKSNGFSSFFSNQGLGRYFPFTELQTATQNF DENAVC<br/> GVGGFGKVYIGEIDGGTQVAIKRGSQSSEQGINEFQTEIQMLS KLRHRHLVSL<br/> IGFCDENKEMILVYEYMSNGPLRDHLYGSKENDPNPIPTLSWKQRLEICIGSA<br/> RGLHYLHTGAAQGIHRDVKTTNILLDENLVAKVSD FGLSKDAPMDEGHVS<br/> TAVKGSFGYLDPEYFRRQQLTDKSDVYSFGVVLFEVLCARPVINPQLPREQV<br/> NLAEYAMNLHRKGMLEKIIDPKIVGTISKGSLRKFVEAAEKCLAEYGVDRPG<br/> MGDVLWNLEYALQLQEASAQVDLSEDKTTMNIEMDLIPGEEMQSPSHSIP</p>                                              |
| <p><b>MDS1</b></p> | <p><b>AT5G38990</b></p> | <p>MICHVLVIFTILVSAVVDATASYEPTDVFLINCGDTSNNMDYSGRNWTTENP<br/> KFMSSNAVDDASFTSSASYQESGIPQVPYLKARIFRYDFTYSFPVSPGWKFLR<br/> LYFYPTRYGSDFDAVKSFFSVNVNRFTLLHNFSVKASIPESSSLIKEFIVPVNQ<br/> TLDLTFTSPNSLAFVNGIEIISMPDRFYKGGFDDVVRNVGRDVF EIDNST<br/> AFETVYRVNVGGKVVGDVGDSGMFRRWLSDEGFLLGINS GAIPNITGVKIN<br/> YTDKTPAYVAPEDVYTT CRLMGNKDSPELNLNFNL TWLFEVDAGFAYIVRL<br/> HFCETQPEVNKTGDRVFSIFFGYQLAMREMDVFRLSGGFRLPMYLD FKVLV<br/> DADGTSQRPSLRVDLTPYKEDYPTYDAILSGVEILKLSNSDGNLAGLNPIPQ<br/> LSPPPQSITPLKGGKSSHVLPIIIAVVGS AVALAFFVLVVVLVVMKRKKKSN<br/> ESSVDTTNKPSTNSSWGPLLHGTGSTNTKSASSLPSDLCRRFSIYEIKSATNDF<br/> EEKLIIGVGGFGSVYKGRIDGGATLVAVKRLEITSNQGAKEFDTELEMLSKL<br/> RHHVHLVSLIGYCCCCNEMVLVYEYMPHGTLKDHLFRRDKASDPPLSWKRR<br/> LEICIGAARGLQYLHTGAKYTIHRDIKTTNILLDENFVAKVSD FGLSRVGPST<br/> ASQTHVSTVVKGTFGYLDPEYFRRQILTEKSDVYSFGVVLLEVLCCRPIRMQ<br/> SVPPEQADLIRWVKSNFNKRTVDQIIDS L TADITSTSMEKFCEIAIRC VQDR<br/> GMERPPMNDVWVALEFALQLHETAKKKNNDNVESLDLMPSGEVGTTT DGE<br/> DDLFSRTTGHV GKSTTTDDSVLVVGDERSGSSWGVFSEINEPKAR</p> |

|                    |                         |                                                                                                                                                                                                                                                                                                                                                                                                                                                                                                                                                                                                                                                                                                                                                                                                                                                                                                                                                                                                               |
|--------------------|-------------------------|---------------------------------------------------------------------------------------------------------------------------------------------------------------------------------------------------------------------------------------------------------------------------------------------------------------------------------------------------------------------------------------------------------------------------------------------------------------------------------------------------------------------------------------------------------------------------------------------------------------------------------------------------------------------------------------------------------------------------------------------------------------------------------------------------------------------------------------------------------------------------------------------------------------------------------------------------------------------------------------------------------------|
| <p><b>MDS2</b></p> | <p><b>AT5G39000</b></p> | <p>MIRHALLIFSILVSTPIVGEGATSTYEPTDVFLFNCGDTSNNVDVSGRNWTAE<br/> NQKILSSNLVNASFTAQASYQESGVSQIPYMTARIFRSEFTYSFPVTPGSNFLR<br/> LYFYPTRYGSQFNAVKSFFSVKVNNGFTLLNFSADLTVKASKPQTEFIIKEFII<br/> PVYQTLNLTFTPSLDSLAFVNGIEIVSIPNRFYSKGGFDDVITNVGSSVDFHIE<br/> NSTAFETVYRLNVGGKTVGDSGMFRRWVSDDEIILSESSGISPIVPDIKINYTE<br/> KTPSYVAPDDVYATSRSMGNADHPEQNLNFNLTWLFTVDAGFSYLVRLHFC<br/> ETLSEVNKEGQRVFSIFIENQTATLEMDVFRMSGGSWIPMYLDYTVIAGSGS<br/> GRRHDLRLDLHPLVSINPKYYDAILNGVEILKMNDPDGNLAGPNPDPLVSPD<br/> LIPNRATPRIRKNKSHILPITLAVVGSLLVVLAMFVVGVLVIMKKKKKSKPSTN<br/> SSWCPLPHGTDSTNTKPAKSLPADLCRRFSIFEIKSATNDFEDKLIIGVGGFGS<br/> VYKQGIDGGATLVAVKRLEITSNQGAKEFETELEMESKLRHVHLVSLIGYCD<br/> EDNEMVLVYEMPHGTLKDHLFRRDKTSDPPLSWKRRLEICIGAARGLQYL<br/> HTGAKYTIHRDIKTTNILLDENFVTKVSDFGLSRVGPTSASQTHVSTVVKGT<br/> FGYLDPEYYRRQVLTEKSDVYSFGVLLLEVLCCRPIRMQSVPEQADLIRWV<br/> KSNYRRGTVDQIIDSLSADITSTSLEKFCEIAVRCVQDRGMRPPMNDVWV<br/> ALEFALQLHETAKKKNDNVESLDLMPGSEVGTTTDGEDDLFSRTTGHVGGKS<br/> TTTDDSVLVVGDERSGSSWGVFSEINEPKAR</p> |
| <p><b>MDS3</b></p> | <p><b>AT5G39020</b></p> | <p>MNCNVLFLLSVLVSVTAGVTAAYHPTDVFLFNCGDTSNNVDNSGRNWTVE<br/> SRQILSSNLVNASFTSEASYQKAGVSRIPYMKARIFRSEFTYSFPVTPGSIFLRL<br/> YFYPTQYKSGFDAVNSFFSVKVNNGFTLLRNFNADSTVQASIPLSNSLIKEFIIP<br/> VHQTLNLTFTPSKNLLAFVNGIEIVSMPDRFYKGGFDNVLRNVSSDVDFQI<br/> DNSTAFESVHRLNVGGQIVNEVDDSGMFRRWLSDDSGNSGSIVNVPGVKI<br/> NYTEKTPAYVAPYDVYATSRMLGNSSNLMFNLTGMFLTVDAGYNYLVRLH<br/> FCETLPQVTKAGQRVFSIFVEDKMAKKETDVIRLSGGPRIPMYLDFSVYVGF<br/> ESGMIQPELRLDLVPLKDTNQTYYDAILSGVEILKLNDSDGNLARPPELLVS<br/> TDSTPDDSNVTPPIKGGKPHVLVILVVGSVIGLATFIVIIIMLLIRQMKRKKKKNK<br/> ENSVIMFKLLLKQYIYAELKKITKSFSHTVGKGGFGTVYRGNLSNGRTVAVK<br/> VLKDLKGNDDFINEVTSMSQTSNVNIVSLLGFCYEGSKRAIIEFLEHGSLD<br/> QFISRNKSLTPNVTTLYGIALGIARGLEYLHYGCKTRIVHFDIKPQNILLDDNF<br/> CPKVADFLAKLCEKRESILSLIDTRGTIGYIAPEVVSRMYGGISHKSDVYSY<br/> GMLVLDMIGARNKVETTTTCNGSTAYFPDWIYKDLNGDQTWIIGDEINEED<br/> NKIVKMMILVSLWCIRPCPSDRPPMNKVVEMIEGSLDALELPPKPSRHISTEL<br/> VLESSSLSDGQEAQKQTQTLDDSTII</p>                                                                   |

|             |                  |                                                                                                                                                                                                                                                                                                                                                                                                                                                                                                                                                                                                                                                                                                                                                                                                                                                                                   |
|-------------|------------------|-----------------------------------------------------------------------------------------------------------------------------------------------------------------------------------------------------------------------------------------------------------------------------------------------------------------------------------------------------------------------------------------------------------------------------------------------------------------------------------------------------------------------------------------------------------------------------------------------------------------------------------------------------------------------------------------------------------------------------------------------------------------------------------------------------------------------------------------------------------------------------------|
| <b>MDS4</b> | <b>AT5G39030</b> | MICFILFVFSFLVSVSATAPYKPDDVFLINCGETDVPFDNHGRTWTQEEKNIL<br>PKNSDNASFSSVVSYKEESGIPQVPYMTARIFRSDFTYSFPVSPGWKFLRLYF<br>YPTSYKSGFDAVNSFVSVTVNDFTLNQNSADLTVKASIPESKSLIKEFIVPVY<br>LTLNLTFRPSNNSLAFVNGIEIVSMPDRFYKGGFDDLITNVGSLIDFEIDNST<br>ASETVHRLNVGGHMVDEVNDSGMFRRWLSDDYEFLIGGVSPYMPDVNISY<br>TEKTPAYVAPAYVYSTCRMMGNAQDTYLNLFNLTWLFVTDAGFSYLVR<br>HFFEKYLKANKQRVFSIFLGNQMAREEMDVIRLSGGPRIPIYLDRIYVGS<br>GPRPDLRLDLHPLVKDNPEYEAAILNGVEILKLNSGNLAIQDNELKPNPPL<br>SSNLTPNHVTQQIKGKSSHLLVKIFIAVGPGLATFVVVLMWLRQMKRK<br>NRKEERVVMFKLLNMYTYAELKKITKSFSYIIGKGGFGTVYGGNLSNGRK<br>VAVKVLKDLKGSADFINEVASMSQTSVNVIVSLLGFCFEGSKRAIVYEFLE<br>NGSLDQFMSRNKSLTQDVTTLYGIALGIARGLEYLHYGCKTRIVHFDIKPQNI<br>LLDGNLCPKVSDVFLAKLCEKRESVLSLMDTRGTIGYIAPEVFSRMYGRVSH<br>KSDVYSFGMLVIDMIGARSKEIVETVDSAASSTYFPDWIKDLEDGEQTWIF<br>GDEITKEEKEIAKKMIVVGLWCIQPCSDRPSMNRVEMMEGSLDALEIPPK<br>PSMHISTEVITESSLSDDGGEDV |
|-------------|------------------|-----------------------------------------------------------------------------------------------------------------------------------------------------------------------------------------------------------------------------------------------------------------------------------------------------------------------------------------------------------------------------------------------------------------------------------------------------------------------------------------------------------------------------------------------------------------------------------------------------------------------------------------------------------------------------------------------------------------------------------------------------------------------------------------------------------------------------------------------------------------------------------|

| <b>RALFs</b>  |                  |                                                                                                                               |
|---------------|------------------|-------------------------------------------------------------------------------------------------------------------------------|
| <b>Name</b>   | <b>Gene ID</b>   | <b>Sequence</b>                                                                                                               |
| <b>RALF1</b>  | <b>AT1G02900</b> | MDKSFTLFLTLTILVVFIISSPPVQAGFANDLGGVAWATTGDNGSGCHGSIAE<br>CIGAEEMDSEINRRILATTKYISYQSLKRNSVPCSRRGASYNCQNGAQA<br>NPYSRGCSKIARCRS |
| <b>RALF2</b>  | <b>AT1G23145</b> | MEARHMLVTILLLSFVFMNIMKVEAQKVIYPAIGRDGARGCSPKDPSCPQQ<br>PEKPYKRGCEKITRCERDRRKQAHLRNPRKVLDDVAVMAKAKQLY                          |
| <b>RALF3</b>  | <b>AT1G23147</b> | MSNLRGTNRFILVAVLVSFVFLSIMNAEARKEIGYPKQRFGEEDRTNPYEEITP<br>PLIGGCDPKNPQTCLPKQANPYRRGCLKITRCQRDV                                |
| <b>RALF4</b>  | <b>AT1G28270</b> | MGVKMLLIFGLLILAMVAKSVNATYPLTKSCINGQGCIGEDDELESMDSET<br>NRRQLARGRRYIGYDALKKNVPCSRGRSYYDCKRRRNPNPYRRGCSAIT<br>HCYRYAR           |
| <b>RALF5</b>  | <b>AT1G35467</b> | MLKAQVFMFVTVLVFVCFVINSNDAKRYIEYPPWQKHPCNPRFPTDCYKR<br>TPANPYRRGCTCISRCRRDCGGLSTWKKLLDTILKIPV                                  |
| <b>RALF6</b>  | <b>AT1G60625</b> | MAAHKKSHIRIFFVSMIILSLFSGFGEGQTYINYNGMKGDIIIPGCSSKNPKEC<br>VKIPAYSYNRGCEISTRQQRQHSSSS                                          |
| <b>RALF7</b>  | <b>AT1G60815</b> | MSARKKNRIHVFFVSIMIIISLVSGFGGEGIKQINYKDLIKDTIPGCTSKNPKECV<br>KVPANTYHRGCEISTRCHREQHSSSG                                        |
| <b>RALF8</b>  | <b>AT1G61563</b> | MGMSKSIKVILSLALVVFLALAGTKVEASVRYITYPAIDRGDHAHVHCDKAHP<br>NTCKKKQANPYRRGCGVLEGCHRETGPKPT                                       |
| <b>RALF9</b>  | <b>AT1G61566</b> | MGMSKSIKVILSLALVVFLALAATKVEATRYITYPAIDRGDHAHVHCDKAHPN<br>TCKKKEANPYQRGCEKINRCRGG                                              |
| <b>RALF10</b> | <b>AT2G19020</b> | MKALVICLLVIFAAVIAVPVESRRKHLDYGVITKCAGNPPPPGCYPPGAQQK<br>NPTPANEYRRGCSKITRCKRD                                                 |
| <b>RALF11</b> | <b>AT2G19030</b> | MKAWLICLLVICA AVIAEPVESRNYIEYGAINKCAGNPPPPGCNPPGAEQKNP<br>TPVNEYSRGCSKIHRCRRD                                                 |

|               |                  |                                                                                                                                                  |
|---------------|------------------|--------------------------------------------------------------------------------------------------------------------------------------------------|
| <b>RALF12</b> | <b>AT2G19040</b> | MKAWVIGLLVICAVVIAEPVESRNYIEYGAINKCAGPNPPPGCNPPGTEQKN<br>PTPVNEYSRGCSKIHRCRRD                                                                     |
| <b>RALF13</b> | <b>AT2G19045</b> | MKAWVICLLVICA AVIAEPVESRNYIEYGAINKCAGPNPPPGCNPPGAEQKN<br>PNPVNEYSRGCSKIHRCRRD                                                                    |
| <b>RALF14</b> | <b>AT2G20660</b> | MKLLIFAVIISVVLFPVLVSSRTIKCDQLSGKCINGEEKEIMNMRLGLDVSSRR<br>ILQASRYISYEALKKNLPDNRREGPDQRDNPYRRSCDVHSHCYRFT                                         |
| <b>RALF15</b> | <b>AT2G22055</b> | MGMSKSIK VIVSLALILFLALAATKVEATRYISYRGMNHGDHAIHCDKAHPN<br>TCKKQVANPYRRGCGTIERCRRDTGRK                                                             |
| <b>RALF16</b> | <b>AT2G32835</b> | MVAYEKSPIVFLFATMMLVMFLFCGSGEARTLGYGSIKGD RIPACGYKNPNS<br>CVKQPVNHYHRGCEKITRCARDAARYTESFNVDDDESPIINLH                                             |
| <b>RALF17</b> | <b>AT2G32885</b> | MGISKKT VVQSFALIIISIVMSTTEANSIGAPAMREDLPKGCAPGSSAGCKMQ<br>PANPYKPGCEASQRCRGG                                                                     |
| <b>RALF18</b> | <b>AT2G33130</b> | MMNMMKLLIIVMIIISAALLPALVVGSRPVKCDNCMDGGEKEEIMKMSSGV<br>DVSHRILQAKRFIDYEALKKNLPAKPDGKPKDPDNKYRRGCSAATGCYRFT<br>N                                  |
| <b>RALF19</b> | <b>AT2G33775</b> | MGIKILLILGLLTLAVVAESANATWTLTKSCVNGQGCIGEDGELDYLMDSET<br>NRRQLAARRSYISYGALRKNNVPCSRGRSYYDCKKRKRANPYRRGCSVIT<br>HCYRQTS                            |
| <b>RALF20</b> | <b>AT2G34825</b> | MVLSKKTIMQSFALMIISIVMSTTEAKTIGNPAMREDEPKGCPPGSPASCKM<br>QPANPYKPGCEASQRCRGT                                                                      |
| <b>RALF21</b> | <b>AT3G04735</b> | MSNMKITNRFMLVATFIACVFISSMNMTVGK VIGYPGLKPDLP CDHHRYP SA<br>CAPSEQPVN PYRRGCSKIHRCRRDSPPAPISRKMLIRGQLIYNNA YNAYIQYP                               |
| <b>RALF22</b> | <b>AT3G05490</b> | MTNTRAIYAVIAILAVISA VESTGDFGDSLDFVRAGSSSLFSGCTGSIAECIAE<br>EEMEFDS DISRRILAQKKYISYGAMRRNSVPCSRRGASYNCQRGAQANPY<br>SRGCSTITRCRR                   |
| <b>RALF23</b> | <b>AT3G16570</b> | MRGLSRNSGAAAIFAILLILAVHNWSVAVSSQSTEFAGDFPPFETECRGTIAE<br>CSVSAALGDGGDLFYGGGEMGEFEMDSEINRRILATRRYISYGALRRNTIPC<br>SRRGASYNCRRGAQANPYSRGCSAITRCRRS |
| <b>RALF24</b> | <b>AT3G23805</b> | MSRSLALVYLSLLCLQTHLSISVTVPIPSVNGEIDAMLNRNGVIGEEEGEEMM<br>PSEISRRVMMMRKQYISYETLRDMVPCQKPGASYACRSGQANAYNRGC<br>SVITRCARDTNDIKT                     |
| <b>RALF25</b> | <b>AT3G25165</b> | MKTFMIILLVICSILIVGRVEANDNKRKYLLLDPCLRPNAPPGCHRQPYKPRT<br>PVNVYSRGCTTINRCRRVQNP                                                                   |
| <b>RALF26</b> | <b>AT3G25170</b> | MKAWMIILLVICVAVVVEQSEARKGRKYLNPGVLDRCRGP NPAGCHPHNS<br>HHKPRVPVHNYSRGCSRITRCRRDA                                                                 |
| <b>RALF27</b> | <b>AT3G29780</b> | MTKTFFSFSFFFTSLLLLLAATSATASTGNVT SGLRYDGCAPGDTV GECITA<br>TVEEED EGVAVVRRILQQRK YLSYKTLQKQPTCDGRIAGNCIGTVNPKGA<br>TCTYYQRCKRAA                   |
| <b>RALF28</b> | <b>AT4G11510</b> | MSILKETKRFMVVAMFIACVFISNNMNVAVANEIGYPGMGRGDRQPGCDH<br>GNCPPDQ PANPYHRGCEKSKRCRGPDPALPRKMI                                                        |
| <b>RALF29</b> | <b>AT4G11653</b> | MIKTKEVTFVTILIVLCVFISTIHAKRYIEYPIRLDLGKGCDPRFPTAAC YK RTP<br>ANPYRRPCTTANRCRRSTSSTRVPSLKT FVEIPPM                                                |
| <b>RALF30</b> | <b>AT4G13075</b> | MKAWVICLMVISIFMMIEPTLAAGGGKFLNPGVLDPCLRPNPPPECQAPGSA<br>GKPRERVNEYKVGCSKLTRCDRVG                                                                 |

|               |                  |                                                                                                                                          |
|---------------|------------------|------------------------------------------------------------------------------------------------------------------------------------------|
| <b>RALF31</b> | <b>AT4G13950</b> | MFNSTALVIFAILFLLISADAFPIPSNGEIDAMLIRNSIIGEDEDLMPTEISR RV<br>LMAQKRYIGYETLRRDMVPCQKPGASYD CRSGQANSYSRGCDTITRCARD<br>TNDINT                |
| <b>RALF32</b> | <b>AT4G14010</b> | MEIKPSRIFSTITIFFLCLLLAHVTSKASSSSLCNGSVAECSSMVETEEMSVIME<br>SWSSQRLTEEQAHKLSYGALRRNQ PACDGGKRGESYSTQCLPPSPNPYSRGC<br>SKHYRCGRDS           |
| <b>RALF33</b> | <b>AT4G15800</b> | MRGLSTKPV AIIAILTVHFLFAAVTSQSSGDFVPIESKCNGTIAECSLSTAE EEE<br>FEMDSEINRRILATTKYISYGALRRNTVPCSRRGASYNCRRGAQANPYSRGC<br>CSAITRCRR           |
| <b>RALF34</b> | <b>AT5G67070</b> | MAASSLNLLLILSLLTFISLQRSESLSDNPSLTLLPDGFDWPISHSDEFDIIDGEE<br>SFEVTEEDDGVTDRRSLYWRRTKYYISYGALSANRVPCPPRSGRSYTHNCF<br>RARGPVHPYSRGCSSITRCRR |
| <b>RALF35</b> | <b>AT1G60913</b> | MAAHKMSLTSLFFVSIVIVLSLFSFGFEGRYIKYRAIAKDRVPDCTQDPKNCV<br>RVPVNQYHLPPGCQNTTHCYREKYHI                                                      |
| <b>RALF36</b> | <b>AT2G32785</b> | MAMLKAISVLCVALLIIFVVKADTINREQVISYESMRVNHAWGCSQKYPQFC<br>QKTRANPYTKPPPKNSEAS                                                              |
| <b>RALF37</b> | <b>AT2G32788</b> | MGISKKSTKAIIMYALIMVFFTFATLKTNAEDVISYEVLLQDHAWGCSPKFP<br>RLSCLKQKANP                                                                      |

**Table S2. Primers**

| <b>Purpose</b>                                                   | <b>Primers Name</b>                         | <b>Sequences(5'-3')</b>                     |
|------------------------------------------------------------------|---------------------------------------------|---------------------------------------------|
| <b>Spacers cloning</b><br>(for <i>hap2</i> mutant)               | HAP2-BsF                                    | ATATATGGTCTCGATTGattgtagcggagatcgtggGTT     |
|                                                                  | HAP2-F0                                     | TGattgtagcggagatcgtggGTTTTAGAGCTAGAAATAGC   |
|                                                                  | HAP2-R0                                     | AACctgtctttccacgtgcacaCAATCTCTTAGTCGACTCTAC |
|                                                                  | HAP2-BsR                                    | ATTATTGGTCTCGAAACctgtctttccacgtgcacaC       |
| <b>Spacers cloning</b><br>(for <i>ralf6 ralf7 ralf16</i> mutant) | RALF6-BsF-1                                 | ATATATGGTCTCGATTGgttcagcggattggagaGTT       |
|                                                                  | RALF6-F0-1                                  | TGgttcagcggattggagaGTTTTAGAGCTAGAAATAGC     |
|                                                                  | RALF6-R0-1                                  | AACgcatactcttacaatcgtgCAATCTCTTAGTCGACTCTAC |
|                                                                  | RALF6-BsR-1                                 | ATTATTGGTCTCGAAACgcatactcttacaatcgtgC       |
|                                                                  | RALF7-BsF-1                                 | ATATATGGTCTCGATTGttataatcattggcagGTT        |
|                                                                  | RALF7-F0-1                                  | TGttataatcattggcagGTTTTAGAGCTAGAAATAGC      |
|                                                                  | RALF16-R0-1                                 | AACtaatgttctgtctccaCAATCTCTTAGTCGACTCTAC    |
|                                                                  | RALF16-BsR-1                                | ATTATTGGTCTCGAAACtaatgttctgtctccaC          |
|                                                                  | RALF6-BsF-2                                 | ATATATGGTCTCGATTGgaatmttgacacattctttGTT     |
|                                                                  | RALF6-F0-2                                  | TGgaatmttgacacattctttGTTTTAGAGCTAGAAATAGC   |
|                                                                  | RALF6-R0-2                                  | AACcgattgtaagatgatgctgCAATCTCTTAGTCGACTCTAC |
|                                                                  | RALF6-BsR-2                                 | ATTATTGGTCTCGAAACcgattgtaagatgatgctgC       |
|                                                                  | RALF7-BsF-2                                 | ATATATGGTCTCGATTGcaaccacgatgtaagtgtGTT      |
|                                                                  | RALF7-F0-2                                  | TGcaaccacgatgtaagtgtGTTTTAGAGCTAGAAATAGC    |
|                                                                  | RALF7-R0-2                                  | AACaaagaatcgctcaaagttcCAATCTCTTAGTCGACTCTAC |
|                                                                  | RALF7-BsR-2                                 | ATTATTGGTCTCGAAACaaagaatcgctcaaagttcC       |
|                                                                  | RALF16-BsF-2                                | ATATATGGTCTCGATTGgagaccgaattccggcatgGTT     |
|                                                                  | RALF16-F0-2                                 | TGgagaccgaattccggcatgGTTTTAGAGCTAGAAATAGC   |
| RALF16-R0-2                                                      | AACggtgtgctcgtgatgctgcCAATCTCTTAGTCGACTCTAC |                                             |
| RALF16-BsR-2                                                     | ATTATTGGTCTCGAAACggtgtgctcgtgatgctgcC       |                                             |
| <b>Spacers cloning</b><br>(for <i>ralf36 ralf37</i> mutant)      | RALF36-BsF                                  | ATATATGGTCTCGATTGtaaggcggataacaatcaacGTT    |
|                                                                  | RALF36-F0                                   | TGtaaggcggataacaatcaacGTTTTAGAGCTAGAAATAGC  |
|                                                                  | RALF37-R0                                   | AACatgcggaagatgtgataagCAATCTCTTAGTCGACTCTAC |
|                                                                  | RALF37-BsR                                  | ATTATTGGTCTCGAAACatgcggaagatgtgataagC       |
| <b>Genotyping for CRISPR mutants and T-DNA mutants</b>           | RALF6-CRI-F                                 | ACTCTATCAGCACATACATTATGCACT                 |
|                                                                  | RALF6-CRI-R                                 | GGGCTTTAATCGTAGGGGTAAAGA                    |
|                                                                  | RALF7-CRI-F                                 | TGAACAGTTTAACTGTGCTGCCA                     |
|                                                                  | RALF7-CRI-R                                 | ATAAACAATTCAAGGTTACAAAAACAAATGGAG           |
|                                                                  | RALF16-CRI-F                                | ATATGTATTATCCCTGGCATATGTAACAACA             |
|                                                                  | RALF16-CRI-R                                | AAATAATCTCAGGAAAAGCATAGAATACA               |
|                                                                  | RALF36-CRI-F                                | ATAAAGCATCAACGCAAAATTAGAAAT                 |
|                                                                  | RALF36-CRI-R                                | GAATACATTTGCCGCCCTCTT                       |
|                                                                  | RALF37-CRI-F                                | TAATCCCTTCATGTTTCTCCACA                     |
|                                                                  | RALF37-CRI-R                                | CCGCAGAAAATTTAGATATATGAGT                   |
|                                                                  | HAP2-CRI-F                                  | CGTCTTGAATCTCGCTGTTCCC                      |
|                                                                  | HAP2-CRI-R                                  | ATGTGAACTACGTTGGCTATTTGGTG                  |
|                                                                  | ANJ-LP                                      | TTCCAGGTTTTGTGAAGATGG                       |
|                                                                  | ANJ-RP                                      | AATCCGTGTGAACACTCGATC                       |
|                                                                  | FER-genotyping-F                            | Reference 13                                |
|                                                                  | FER-genotyping-R                            | Reference 13                                |



|                                                     |                                                        |                                                                      |
|-----------------------------------------------------|--------------------------------------------------------|----------------------------------------------------------------------|
|                                                     | HERK1-<br>genotyping-F                                 | <i>Reference 13</i>                                                  |
|                                                     | HERK1-<br>genotyping-R                                 | <i>Reference 13</i>                                                  |
|                                                     | CRISPR-Cas9 for<br>mutant genotyping<br>inner primer F | <i>Reference 13</i>                                                  |
|                                                     | CRISPR-Cas9 for<br>mutant genotyping<br>inner primer R | <i>Reference 13</i>                                                  |
|                                                     | CRISPR-Cas9 for<br>mutant genotyping<br>outer primer F | <i>Reference 13</i>                                                  |
|                                                     | CRISPR-Cas9 for<br>mutant genotyping<br>outer primer R | <i>Reference 13</i>                                                  |
|                                                     | MYB97-1-LP                                             | <i>Reference 19</i>                                                  |
|                                                     | MYB97-1-RP                                             | <i>Reference 19</i>                                                  |
|                                                     | MYB101-1-LP                                            | <i>Reference 19</i>                                                  |
|                                                     | MYB101-1-RP                                            | <i>Reference 19</i>                                                  |
|                                                     | MYB120-3-LP                                            | <i>Reference 19</i>                                                  |
|                                                     | MYB120-3-RP                                            | <i>Reference 19</i>                                                  |
|                                                     | ACA9-1-LP                                              | TCTCAATCTTGCTCTTAATCCATT                                             |
|                                                     | ACA9-1-RP                                              | AGGACAACAAGAGCCACTGAG                                                |
|                                                     | LBb1.3                                                 | ATTTTGCCGATTTCCGAAC                                                  |
| <b>CAS9 identification</b><br>(for CRISPR mutants)  | Hyg-IDF                                                | CAAAGATCGTTATGTTTATCGGCACT                                           |
|                                                     | Hyg-IDR                                                | AAGAAGATGTTGGCGACCTCGTATT                                            |
| <b>Subcellular<br/>localization<br/>observation</b> | RALF6-NSC-<br>pDONR221-R                               | GGGGACCACTTTGTACAAGAAAGCTGGGTAACCTCG<br>AACTCGAATGCTGTTGAC           |
|                                                     | RALF7-NSC-<br>pDONR221-R                               | GGGGACCACTTTGTACAAGAAAGCTGGGTAACCCG<br>AACTCGAATGCTGTTC              |
|                                                     | RALF16-NSC-<br>pDONR221-R                              | GGGGACCACTTTGTACAAGAAAGCTGGGTAATGGA<br>GATTAATAATGGGACTTTCATC        |
|                                                     | RALF36-NSC-<br>pDONR221-R                              | GGGGACCACTTTGTACAAGAAAGCTGGGTATGAAG<br>CTTCACTGTTTTTTGGGG            |
|                                                     | RALF37-NSC-<br>pDONR221-R                              | GGGGACCACTTTGTACAAGAAAGCTGGGTAGGGAT<br>TGGCCTTTTGTGTTGAGA            |
| <b>Expression pattern<br/>analysis</b>              | pRALF6-<br>pDONR221-F                                  | GGGGACAAGTTTGTACAAAAAAGCAGGCTTAGGTT<br>CTTTTCAACGAAGCAGTGA           |
|                                                     | pRALF6-<br>pDONR221-R                                  | GGGGACCACTTTGTACAAGAAAGCTGGGTATGTTTT<br>TTGAGAAAACAAAACAATGT         |
|                                                     | pRALF7-<br>pDONR221-F                                  | GGGGACAAGTTTGTACAAAAAAGCAGGCTTACGTT<br>GAGAGAGGAGGTAGCTACAGC         |
|                                                     | pRALF7-<br>pDONR221-R                                  | GGGGACCACTTTGTACAAGAAAGCTGGGTATGTTTT<br>TTTTTAAAAACAATGTATTTGAATC    |
|                                                     | pRALF16-<br>pDONR221-F                                 | GGGGACAAGTTTGTACAAAAAAGCAGGCTTAGCAG<br>ACAATGGTAACTAGTAACTGGACA      |
|                                                     | pRALF16-<br>pDONR221-R                                 | GGGGACCACTTTGTACAAGAAAGCTGGGTAATTTTT<br>TTTTGTAAATTTTCTTCTTAACTATTTT |

|                                          |                                   |                                                                   |
|------------------------------------------|-----------------------------------|-------------------------------------------------------------------|
|                                          | pRALF36-<br>pDONR221-F            | GGGGACAAGTTTGTACAAAAAAGCAGGCTTAGCAT<br>AACCATCTCTTGCTTCTATACCA    |
|                                          | pRALF36-<br>pDONR221-R            | GGGGACCACTTTGTACAAGAAAGCTGGGTAATTTTC<br>AAAACGAACAAAGTAACTAAATG   |
|                                          | pRALF37-<br>pDONR221-F            | GGGGACAAGTTTGTACAAAAAAGCAGGCTTAGGGT<br>TGGAATTTTTGTGATA           |
|                                          | pRALF37-<br>pDONR221-R            | GGGGACCACTTTGTACAAGAAAGCTGGGTAATCTTT<br>TTCTTTCTTTTTTTTTTTGAATGAA |
|                                          | GG_FER_A_F                        | AACAGGTCTCAACCTAATGTGATGTTTGTGTTATA                               |
|                                          | GG_FER_B_R                        | AACAGGTCTCTTGTTCGATCAAGAGCACTTCTCCGG                              |
|                                          | GG_FER_E_R                        | AACAGGTCTCTCTGAACGTCCCTTTGGATTCATGAT                              |
|                                          | GG_ANJ_A_F                        | AACAGGTCTCAACCTCAAATATAAATATTAGTTT                                |
|                                          | GG_ANJ_B_R                        | AACAGGTCTCTTGTTCCTTCACAAAACCTGGAAATT                              |
|                                          | GG_HERK1_A_F                      | AACAGGTCTCAACCTGAGTAAACGGCTCACGTTTGT                              |
|                                          | GG_HERK1_B_R                      | AACAGGTCTCTTGTTTTTGACCCAATAGAGAATAA                               |
| <b>Modules for<br/>GreenGate cloning</b> | GG_E_HSP18.2_F                    | AACAGGTCTCACTGCTGAATATGAAGATGAAGATG                               |
|                                          | GG_E_HSP18.2_R                    | AACAGGTCTCATAGTTATGAGCCCATCTTATCTTT                               |
|                                          | P16                               | <i>Reference 34</i>                                               |
|                                          | Omega element                     | <i>Reference 34</i>                                               |
|                                          | SV40-NLS                          | <i>Reference 34</i>                                               |
|                                          | BASTA selection<br>marker         | <i>Reference 34</i>                                               |
|                                          | F-H adapter                       | <i>Reference 34</i>                                               |
|                                          | H-A adapter                       | <i>Reference 34</i>                                               |
|                                          | GSAGAG-<br>mCitrine               | <i>Reference 47</i>                                               |
|                                          | GSAGAG-<br>mScarlet               | <i>Reference 47</i>                                               |
|                                          | SGAGAG-<br>mCitrine               | <i>Reference 47</i>                                               |
|                                          | Remorin-Anker                     | <i>Reference 47</i>                                               |
|                                          | <b>Ectodomains<br/>expression</b> | FER-ED-TOPO-F                                                     |
| FER-ED-<br>TOPO-R(SC)                    |                                   | TTACGTATTGCTTTTCGATTTCTTAGT                                       |
| ANJ-ED-TOPO-F                            |                                   | caccAATTACCTCATCAACTGTGGAT                                        |
| ANJ-ED-<br>TOPO-R(SC)                    |                                   | TTACATACCAACATTCTTCTTAGTGG                                        |
| HERK1-ED-<br>TOPO-F                      |                                   | caccAATTACTTGATCAACTGTGGATC                                       |
| FER- <i>Bam</i> H I-27-5'                |                                   | GAAATTGGATCCATGGCTGCTGATTACTCTCCAACA                              |
| FER-447-His-T-<br><i>Xho</i> I-3'        |                                   | GAAATTCTCGAGTCAGTGATGGTGATGGTGATGAG<br>CCGTATTGCTTTTCGATTT        |
| FER-447- <i>Xho</i> I-3'                 |                                   | GAAATTCTCGAG AGCCGTATTGCTTTTCGATTT                                |
| HERK1- <i>Bam</i> H I-<br>25-5'          |                                   | GAAATTGGATCCATGTTACACCTGTGGATAATTAC                               |
| HERK1-405-His-T-<br><i>Xho</i> I-3'      |                                   | GAAATTCTCGAGTCAGTGATGGTGATGGTGATG<br>CCCGAGATTACTTACTGCT          |

|                         |                                    |                                                             |
|-------------------------|------------------------------------|-------------------------------------------------------------|
|                         | HERK1-405-<br><i>Xho</i> I-3'      | GAAATTCTCGAG CCCGAGATTACTCTTACTGCT                          |
|                         | ANJ- <i>Bam</i> H I-<br>25-5'      | GAAATTGGATCCATG<br>TACGTACCAGTGGATAATTAC                    |
|                         | ANJ-405-His-T-<br><i>Xho</i> I-3'  | GAAATTCTCGAGTCAGTGATGGTGATGGTGATG<br>ACCAACATTCTTCTTAGTGTT  |
|                         | ANJ-405- <i>Xho</i> I-3'           | GAAATTCTCGAG ACCAACATTCTTCTTAGTGTT                          |
|                         | CVY1- <i>Bam</i> H I-<br>22-5'     | GAAATTGGATCCATG TCACACATCTCCTCTGTTTCT                       |
|                         | CVY1-398-His-T-<br><i>Xho</i> I-3' | GAAATTCTCGAGTCAGTGATGGTGATGGTGATG<br>AGAACCATCAGGTAATAATGGC |
| <b>qRT-PCR analysis</b> | FER-RT-F                           | TCTCCGTCCTTTGGTCCT                                          |
|                         | FER-RT-R                           | GTTGGACCCATAGACCTCGC                                        |
|                         | HERK1-RT-F                         | GTAGGCGGTAACCTCTGGCTC                                       |
|                         | HERK1-RT-R                         | GTTAGACGCAACAAGCGGAC                                        |
|                         | HERK2-RT-F                         | AAAACGAGCCACCCACATT                                         |
|                         | HERK2-RT-R                         | TTCCGCAAGGTTGATCTGGT                                        |
|                         | ANJ-RT-F                           | TTCCGTCATCGCCATTGGT                                         |
|                         | ANJ-RT-R                           | GTGACGGGTCGATGATGTGT                                        |
|                         | ANX1-RT-F                          | TACCGAGACGCATTTGCCTT                                        |
|                         | ANX1-RT-R                          | CCTTTCTCTCCTGTCCACCC                                        |
|                         | ANX2-RT-F                          | CAGCTCGATCACAAGGACCA                                        |
|                         | ANX2-RT-R                          | ATGGCTTAGGGTTTGGACCG                                        |
|                         | AT2G23200-RT-F                     | AGTGGCTCAGAAGGAGCAATC                                       |
|                         | AT2G23200-RT-R                     | ACTCGGTCTCTCATCTCCATAC                                      |
|                         | AT5G24010-RT-F                     | TGTGGAGGACTTGGGTTGTT                                        |
|                         | AT5G24010-RT-R                     | GCCAACCACGATCCAGACAA                                        |
|                         | MDS1-RT-F                          | TAGGTGGAAAAGTGGTGGGC                                        |
|                         | MDS1-RT-R                          | AAGCCCCGCAAGATTACCAT                                        |
|                         | THE1-RT-F                          | ACCGTTAGCGTTGGACCTG                                         |
|                         | THE1-RT-R                          | CCCCAAGCAACGAACTCTCA                                        |
|                         | CAP1-RT-F                          | CGCCGTTGAAATCGTCTCTG                                        |
|                         | CAP1-RT-R                          | CGCTGGTTAGTGAGGAGAGG                                        |
|                         | ACTIN8-RT-F                        | ACTTTCCAGCAGATGTGGATC                                       |
|                         | ACTIN8-RT-R                        | CGGGTTTTCAAACCTGCTCC                                        |

**Table S3. Ectodomains of Receptor-like kinases (RLKs) for protein expression**

| RLKs         | Sequence                                                                                                                                                                                                                                                                                                                                                                                                                                                          |
|--------------|-------------------------------------------------------------------------------------------------------------------------------------------------------------------------------------------------------------------------------------------------------------------------------------------------------------------------------------------------------------------------------------------------------------------------------------------------------------------|
| <b>FER</b>   | AADYSPTEKILLNCGGGASNLTDTDNRIWISDVKSKFLSSSEDSKTSPALTQDPS<br>VPEVPYMTARVFRSPFTYTFPVASGRKFVRLYFYPN SYDGLNATNSLFSVSFGPY<br>TLLKNFSASQTAEALTYAFIIKEFVVNVEGGTLNMTFTPEAPSNA YAFVNGIEVT<br>SMPDMYSSTDGTLTMVGSSGSVTIDNSTALENVYRLNVGGNDISPSADTGLYRS<br>WYDDQPYIFGAGLGIPETADPNMTIKYPTGTPTYVAPVDVYSTARSMGPTAQINL<br>NYNLTWIFSIDSGFTYL VRLHFCEVSSNITKINQRVFTIYLNNQTAEPEADVIAWTS<br>SNGVPFHKDYVVNPPEGNGQDLWLALHPNPVNKPEYYDSLNGVEIFKMNTS<br>DGNLAGTNPPIGPQVTADPSKVL RPTTRKSKSNTA |
| <b>ANJ</b>   | YVPVDNYLINC GSSTNVTVTSRVFISDNLASNFLTSPNEILAASNRNSNSDIYQTAR<br>IFTGISKYRFSVARGRHWIRLHFNPFQYQNFQMVSAKFSVSSETHVLLSDFTVSSR<br>VMKEYSLNVA TDHLELTFTPSGDSFAFLNALEVVSVPDTLFSGDPSFAGSPGKFQ<br>GLSWQALETVYRVNMGGPRVTPSNDTLSRIWEPDSEFLVEKNLVKSVSKIASVD<br>YVPGFATEETAPRTVYGTCTEMNSADNPSSNFNVTWDFDVPDGFQYFLRFHFCDI<br>VSKALNQLYFNL YVDSMDVVENLDLSSYLSNTLSGAYAMDFVTGS AKLTKRIRV<br>SIGRSSVHTDYPTAILNGLEIMKMNNSKSQLSIGTFLPSGSSSTTKKNVG                                         |
| <b>HERK1</b> | FTPVDNYLINC GSPTNGTLMGRIFLSDKLSSKLLTSSKEILASVGGNSGSDIYHTAR<br>VFTEVSSYKFSVTRGRHWVRLYFNPFYQNFKMGS AKFAVSSQSHVLLSDFTVT<br>SSKVVKEYSLNVT TNDLVLTFTPSSGSFAFVNAIEVISIPDTLITGSPRFVGNPAQFP<br>DMSMQGLETIHRVNMGGPLVASNNDTLTRTWVPDSEFLLEKNLAKSMSKFSTV<br>NFVPGYATEDSAPRTVYGSCTEMNSADNPNSIFNVTWEFDVDPGFQYYFRHFHC<br>DIVLSLSL NQLYFNL YVDSMVAATDIDLSTLVDNTLAGAYSMDFVTQTPKGSNKV<br>RVSIGPSTVHTDYPNAIVNGLEIMKMNNSKGQLSTGT FVPGSSSSSKSNLG                                       |
| <b>CVY1</b>  | SHISSVSDTFFINCGSPTNVTVNNRTFVSDNNLVQGF SVGTTDSNSGDESTL FQTA<br>RVFSDESSSTYRFPIEEHGWFLIRIYFLPLVSASQDLTTARFSVSAQNFTLIREYKPS<br>TTSVVREYILNVT TDSLLLQFLPRTGVSFINALEVLRLPETLIPEDAKLIGTQKDL<br>KLSSHAMETVSRVNMGNLSVSRDQDKLWRQWSDSAYKAHF GTPVMNLKAV<br>NFSAGGITDDIAPVYVYGTATRLNSDLDPNTNANL TWTFKVEPGFDYFVRFHFNCN<br>IIVDPFGFERQIRFDIFVNSEKVRTIDMTEVLNGTFGAPFFVDAVMRKAKSREGFL<br>NLSIGLVMDVSSYPVSFINGFEISKLSNDKRS LDAFDAILPDGS                                            |

**Peptide sequences used for synthesis**

| Peptide              | Sequence                                                                          |
|----------------------|-----------------------------------------------------------------------------------|
| <b>Biotin-RALF6</b>  | Biotin-QTYINYNGMKGDIIPGCSSKNPKECVKIPAYSYNRGCEISTR CQRQQHSSSS                      |
| <b>Biotin-RALF7</b>  | Biotin-<br>EGIKQINYKDLIKDTIPGCTSKNPKECVKVPANTYHRGCEISTRCHREQHSSSG                 |
| <b>Biotin-RALF16</b> | Biotin-<br>RTLGYGSIKGDRIPACGYKNPNSCVKQPVNHYHRGCEKITRCARDAARYTESFN<br>VDDDESPIINLH |
| <b>Biotin-RALF36</b> | Biotin-REQVISYESMRVNHAWGCSQKYPQFCQKTRANPYTKPPPKNSEAS                              |
| <b>Biotin-RALF37</b> | Biotin-AEDVISYEVLQDHAWGCSPKFPRLSCLKQKANP                                          |
| <b>Biotin-elf24</b>  | Acetyl-SKEKFERTKPHVNVGTIGHVDHGK-biotin                                            |

## References and Notes

1. D. P. Wolf, The block to sperm penetration in zonal-free mouse eggs. *Dev. Biol.* **64**, 1–10 (1978). [doi:10.1016/0012-1606\(78\)90056-8](https://doi.org/10.1016/0012-1606(78)90056-8) [Medline](#)
2. J. P. Evans, Preventing polyspermy in mammalian eggs—Contributions of the membrane block and other mechanisms. *Mol. Reprod. Dev.* **87**, 341–349 (2020). [doi:10.1002/mrd.23331](https://doi.org/10.1002/mrd.23331) [Medline](#)
3. J. Zhang, Q. Huang, S. Zhong, A. Bleckmann, J. Huang, X. Guo, Q. Lin, H. Gu, J. Dong, T. Dresselhaus, L.-J. Qu, Sperm cells are passive cargo of the pollen tube in plant fertilization. *Nat. Plants* **3**, 17079 (2017). [doi:10.1038/nplants.2017.79](https://doi.org/10.1038/nplants.2017.79) [Medline](#)
4. S. Zhong, L.-J. Qu, Peptide/receptor-like kinase-mediated signaling involved in male–female interactions. *Curr. Opin. Plant Biol.* **51**, 7–14 (2019). [doi:10.1016/j.pbi.2019.03.004](https://doi.org/10.1016/j.pbi.2019.03.004) [Medline](#)
5. S. Zhong, M. Liu, Z. Wang, Q. Huang, S. Hou, Y.-C. Xu, Z. Ge, Z. Song, J. Huang, X. Qiu, Y. Shi, J. Xiao, P. Liu, Y.-L. Guo, J. Dong, T. Dresselhaus, H. Gu, L.-J. Qu, Cysteine-rich peptides promote interspecific genetic isolation in *Arabidopsis*. *Science* **364**, eaau9564 (2019). [doi:10.1126/science.aau9564](https://doi.org/10.1126/science.aau9564) [Medline](#)
6. K. M. Beale, A. R. Leydon, M. A. Johnson, Gamete fusion is required to block multiple pollen tubes from entering an *Arabidopsis* ovule. *Curr. Biol.* **22**, 1090–1094 (2012). [doi:10.1016/j.cub.2012.04.041](https://doi.org/10.1016/j.cub.2012.04.041) [Medline](#)
7. R. D. Kasahara, D. Maruyama, Y. Hamamura, T. Sakakibara, D. Twell, T. Higashiyama, Fertilization recovery after defective sperm cell release in *Arabidopsis*. *Curr. Biol.* **22**, 1084–1089 (2012). [doi:10.1016/j.cub.2012.03.069](https://doi.org/10.1016/j.cub.2012.03.069) [Medline](#)
8. T. Mori, H. Kuroiwa, T. Higashiyama, T. Kuroiwa, GENERATIVE CELL SPECIFIC 1 is essential for angiosperm fertilization. *Nat. Cell Biol.* **8**, 64–71 (2006). [doi:10.1038/ncb1345](https://doi.org/10.1038/ncb1345) [Medline](#)
9. K. von Besser, A. C. Frank, M. A. Johnson, D. Preuss, *Arabidopsis* HAP2 (*GCSI*) is a sperm-specific gene required for pollen tube guidance and fertilization. *Development* **133**, 4761–4769 (2006). [doi:10.1242/dev.02683](https://doi.org/10.1242/dev.02683) [Medline](#)
10. R. Palanivelu, D. Preuss, Distinct short-range ovule signals attract or repel *Arabidopsis thaliana* pollen tubes *in vitro*. *BMC Plant Biol.* **6**, 7 (2006). [doi:10.1186/1471-2229-6-7](https://doi.org/10.1186/1471-2229-6-7) [Medline](#)
11. Q. Duan, M. J. Liu, D. Kita, S. S. Jordan, F. J. Yeh, R. Yvon, H. Carpenter, A. N. Federico, L. E. Garcia-Valencia, S. J. Eyles, C.-S. Wang, H.-M. Wu, A. Y. Cheung, FERONIA controls pectin- and nitric oxide-mediated male-female interaction. *Nature* **579**, 561–566 (2020). [doi:10.1038/s41586-020-2106-2](https://doi.org/10.1038/s41586-020-2106-2) [Medline](#)

12. J. M. Escobar-Restrepo, N. Huck, S. Kessler, V. Gagliardini, J. Gheyselinck, W.-C. Yang, U. Grossniklaus, The FERONIA receptor-like kinase mediates male-female interactions during pollen tube reception. *Science* **317**, 656–660 (2007). [doi:10.1126/science.1143562](https://doi.org/10.1126/science.1143562) [Medline](#)
13. S. Galindo-Trigo, N. Blanco-Touriñán, T. A. DeFalco, E. S. Wells, J. E. Gray, C. Zipfel, L. M. Smith, CrRLK1L receptor-like kinases HERK1 and ANJEA are female determinants of pollen tube reception. *EMBO Rep.* **21**, e48466 (2020). [doi:10.15252/embr.201948466](https://doi.org/10.15252/embr.201948466) [Medline](#)
14. Z. Ge, T. Dresselhaus, L.-J. Qu, How CrRLK1L receptor complexes perceive RALF signals. *Trends Plant Sci.* **24**, 978–981 (2019). [doi:10.1016/j.tplants.2019.09.002](https://doi.org/10.1016/j.tplants.2019.09.002) [Medline](#)
15. M. Haruta, G. Sabat, K. Stecker, B. B. Minkoff, M. R. Sussman, A peptide hormone and its receptor protein kinase regulate plant cell expansion. *Science* **343**, 408–411 (2014). [doi:10.1126/science.1244454](https://doi.org/10.1126/science.1244454) [Medline](#)
16. C. Li, F.-L. Yeh, A. Y. Cheung, Q. Duan, D. Kita, M.-C. Liu, J. Maman, E. J. Luu, B. W. Wu, L. Gates, M. Jalal, A. Kwong, H. Carpenter, H.-M. Wu, Glycosylphosphatidylinositol-anchored proteins as chaperones and co-receptors for FERONIA receptor kinase signaling in Arabidopsis. *eLife* **4**, e06587 (2015). [doi:10.7554/eLife.06587](https://doi.org/10.7554/eLife.06587) [Medline](#)
17. M. Stegmann, J. Monaghan, E. Smakowska-Luzan, H. Rovenich, A. Lehner, N. Holton, Y. Belkhadir, C. Zipfel, The receptor kinase FER is a RALF-regulated scaffold controlling plant immune signaling. *Science* **355**, 287–289 (2017). [doi:10.1126/science.aal2541](https://doi.org/10.1126/science.aal2541) [Medline](#)
18. A. R. Leydon, K. M. Beale, K. Woroniecka, E. Castner, J. Chen, C. Horgan, R. Palanivelu, M. A. Johnson, Three MYB transcription factors control pollen tube differentiation required for sperm release. *Curr. Biol.* **23**, 1209–1214 (2013). [doi:10.1016/j.cub.2013.05.021](https://doi.org/10.1016/j.cub.2013.05.021) [Medline](#)
19. Y. Liang, Z.-M. Tan, L. Zhu, Q.-K. Niu, J.-J. Zhou, M. Li, L.-Q. Chen, X.-Q. Zhang, D. Ye, MYB97, MYB101 and MYB120 function as male factors that control pollen tube-synergid interaction in *Arabidopsis thaliana* fertilization. *PLOS Genet.* **9**, e1003933 (2013). [doi:10.1371/journal.pgen.1003933](https://doi.org/10.1371/journal.pgen.1003933) [Medline](#)
20. A. Abarca, C. M. Franck, C. Zipfel, Family-wide evaluation of RAPID ALKALINIZATION FACTOR peptides. *Plant Physiol.* **187**, 996–1010 (2021). [doi:10.1093/plphys/kiab308](https://doi.org/10.1093/plphys/kiab308) [Medline](#)
21. Q. Duan, D. Kita, E. A. Johnson, M. Aggarwal, L. Gates, H.-M. Wu, A. Y. Cheung, Reactive oxygen species mediate pollen tube rupture to release sperm for fertilization in *Arabidopsis*. *Nat. Commun.* **5**, 3129 (2014). [doi:10.1038/ncomms4129](https://doi.org/10.1038/ncomms4129) [Medline](#)
22. Y. Hamamura, C. Saito, C. Awai, D. Kurihara, A. Miyawaki, T. Nakagawa, M. M. Kanaoka, N. Sasaki, A. Nakano, F. Berger, T. Higashiyama, Live-cell

- imaging reveals the dynamics of two sperm cells during double fertilization in *Arabidopsis thaliana*. *Curr. Biol.* **21**, 497–502 (2011). [doi:10.1016/j.cub.2011.02.013](https://doi.org/10.1016/j.cub.2011.02.013) [Medline](#)
23. S. Sprunck, S. Rademacher, F. Vogler, J. Gheyselinck, U. Grossniklaus, T. Dresselhaus, Egg cell-secreted EC1 triggers sperm cell activation during double fertilization. *Science* **338**, 1093–1097 (2012). [doi:10.1126/science.1223944](https://doi.org/10.1126/science.1223944) [Medline](#)
24. P. Denninger, A. Bleckmann, A. Lausser, F. Vogler, T. Ott, D. W. Ehrhardt, W. B. Frommer, S. Sprunck, T. Dresselhaus, G. Grossmann, Male-female communication triggers calcium signatures during fertilization in *Arabidopsis*. *Nat. Commun.* **5**, 4645 (2014). [doi:10.1038/ncomms5645](https://doi.org/10.1038/ncomms5645) [Medline](#)
25. Y. Hamamura, M. Nishimaki, H. Takeuchi, A. Geitmann, D. Kurihara, T. Higashiyama, Live imaging of calcium spikes during double fertilization in *Arabidopsis*. *Nat. Commun.* **5**, 4722 (2014). [doi:10.1038/ncomms5722](https://doi.org/10.1038/ncomms5722) [Medline](#)
26. T. Dresselhaus, S. Sprunck, G. M. Wessel, Fertilization mechanisms in flowering plants. *Curr. Biol.* **26**, R125–R139 (2016). [doi:10.1016/j.cub.2015.12.032](https://doi.org/10.1016/j.cub.2015.12.032) [Medline](#)
27. M. Schiøtt, S. M. Romanowsky, L. Baekgaard, M. K. Jakobsen, M. G. Palmgren, J. F. Harper, A plant plasma membrane  $\text{Ca}^{2+}$  pump is required for normal pollen tube growth and fertilization. *Proc. Natl. Acad. Sci. U.S.A.* **101**, 9502–9507 (2004). [doi:10.1073/pnas.0401542101](https://doi.org/10.1073/pnas.0401542101) [Medline](#)
28. R. Völz, J. Heydlauff, D. Ripper, L. von Lyncker, R. Groß-Hardt, Ethylene signaling is required for synergid degeneration and the establishment of a pollen tube block. *Dev. Cell* **25**, 310–316 (2013). [doi:10.1016/j.devcel.2013.04.001](https://doi.org/10.1016/j.devcel.2013.04.001) [Medline](#)
29. D. Maruyama, R. Völz, H. Takeuchi, T. Mori, T. Igawa, D. Kurihara, T. Kawashima, M. Ueda, M. Ito, M. Umeda, S. Nishikawa, R. Groß-Hardt, T. Higashiyama, Rapid elimination of the persistent synergid through a cell fusion mechanism. *Cell* **161**, 907–918 (2015). [doi:10.1016/j.cell.2015.03.018](https://doi.org/10.1016/j.cell.2015.03.018) [Medline](#)
30. X. Yu, X. Zhang, P. Zhao, X. Peng, H. Chen, A. Bleckmann, A. Bazhenova, C. Shi, T. Dresselhaus, M. X. Sun, Fertilized egg cells secrete endopeptidases to avoid polytubey. *Nature* **592**, 433–437 (2021). [doi:10.1038/s41586-021-03387-5](https://doi.org/10.1038/s41586-021-03387-5) [Medline](#)
31. C. Liu, L. Shen, Y. Xiao, D. Vyshedsky, C. Peng, X. Sun, Z. Liu, L. Cheng, H. Zhang, Z. Han, J. Chai, H.-M. Wu, A. Y. Cheung, C. Li, Pollen PCP-B peptides unlock a stigma peptide-receptor kinase gating mechanism for pollination. *Science* **372**, 171–175 (2021). [doi:10.1126/science.abc6107](https://doi.org/10.1126/science.abc6107) [Medline](#)

32. L. Zhang, J. Huang, S. Su, X. Wei, L. Yang, H. Zhao, J. Yu, J. Wang, J. Hui, S. Hao, S. Song, Y. Cao, M. Wang, X. Zhang, Y. Zhao, Z. Wang, W. Zeng, H.-M. Wu, Y. Yuan, X. Zhang, A. Y. Cheung, Q. Duan, FERONIA receptor kinase-regulated reactive oxygen species mediate self-incompatibility in *Brassica rapa*. *Curr. Biol.* **31**, 3004–3016.e4 (2021). [doi:10.1016/j.cub.2021.04.060](https://doi.org/10.1016/j.cub.2021.04.060) [Medline](#)
33. Z. Ge, T. Bergonci, Y. Zhao, Y. Zou, S. Du, M.-C. Liu, X. Luo, H. Ruan, L. E. García-Valencia, S. Zhong, S. Hou, Q. Huang, L. Lai, D. S. Moura, H. Gu, J. Dong, H.-M. Wu, T. Dresselhaus, J. Xiao, A. Y. Cheung, L.-J. Qu, *Arabidopsis* pollen tube integrity and sperm release are regulated by RALF-mediated signaling. *Science* **358**, 1596–1600 (2017). [doi:10.1126/science.aao3642](https://doi.org/10.1126/science.aao3642) [Medline](#)
34. A. Lampropoulos, Z. Sutikovic, C. Wenzl, I. Maegele, J. U. Lohmann, J. Forner, GreenGate - a novel, versatile, and efficient cloning system for plant transgenesis. *PLOS ONE* **8**, e83043 (2013). [doi:10.1371/journal.pone.0083043](https://doi.org/10.1371/journal.pone.0083043) [Medline](#)
35. S. J. Clough, A. F. Bent, Floral dip: A simplified method for *Agrobacterium*-mediated transformation of *Arabidopsis thaliana*. *Plant J.* **16**, 735–743 (1998). [doi:10.1046/j.1365-3113x.1998.00343.x](https://doi.org/10.1046/j.1365-3113x.1998.00343.x) [Medline](#)
36. D. Kim, G. Pertea, C. Trapnell, H. Pimentel, R. Kelley, S. L. Salzberg, TopHat2: Accurate alignment of transcriptomes in the presence of insertions, deletions and gene fusions. *Genome Biol.* **14**, R36 (2013). [doi:10.1186/gb-2013-14-4-r36](https://doi.org/10.1186/gb-2013-14-4-r36) [Medline](#)
37. C. Trapnell, B. A. Williams, G. Pertea, A. Mortazavi, G. Kwan, M. J. van Baren, S. L. Salzberg, B. J. Wold, L. Pachter, Transcript assembly and quantification by RNA-Seq reveals unannotated transcripts and isoform switching during cell differentiation. *Nat. Biotechnol.* **28**, 511–515 (2010). [doi:10.1038/nbt.1621](https://doi.org/10.1038/nbt.1621) [Medline](#)
38. S. Picelli, O. R. Faridani, A. K. Björklund, G. Winberg, S. Sagasser, R. Sandberg, Full-length RNA-seq from single cells using Smart-seq2. *Nat. Protoc.* **9**, 171–181 (2014). [doi:10.1038/nprot.2014.006](https://doi.org/10.1038/nprot.2014.006) [Medline](#)
39. Z. P. Wang, H.-L. Xing, L. Dong, H.-Y. Zhang, C.-Y. Han, X.-C. Wang, Q.-J. Chen, Egg cell-specific promoter-controlled CRISPR/Cas9 efficiently generates homozygous mutants for multiple target genes in *Arabidopsis* in a single generation. *Genome Biol.* **16**, 144 (2015). [doi:10.1186/s13059-015-0715-0](https://doi.org/10.1186/s13059-015-0715-0) [Medline](#)
40. H. L. Xing, L. Dong, Z.-P. Wang, H.-Y. Zhang, C.-Y. Han, B. Liu, X.-C. Wang, Q.-J. Chen, A CRISPR/Cas9 toolkit for multiplex genome editing in plants. *BMC Plant Biol.* **14**, 327 (2014). [doi:10.1186/s12870-014-0327-y](https://doi.org/10.1186/s12870-014-0327-y) [Medline](#)



41. C. Engler, R. Kandzia, S. Marillonnet, A one pot, one step, precision cloning method with high throughput capability. *PLOS ONE* **3**, e3647 (2008). [doi:10.1371/journal.pone.0003647](https://doi.org/10.1371/journal.pone.0003647) [Medline](#)
42. M. T. M. Willemse, T. A. Plyushch, M. C. Reinders, In vitro micropylar penetration of the pollen tube in the ovule of *Gasteria verrucosa* (Mill.) H. Duval and *Lilium longiflorum* Thunb.: Conditions attraction and application. *Plant Sci.* **108**, 201–208 (1995). [doi:10.1016/0168-9452\(95\)04133-F](https://doi.org/10.1016/0168-9452(95)04133-F)
43. M. Zhang, R. Zhang, X. Qu, S. Huang, Arabidopsis FIM5 decorates apical actin filaments and regulates their organization in the pollen tube. *J. Exp. Bot.* **67**, 3407–3417 (2016). [doi:10.1093/jxb/erw160](https://doi.org/10.1093/jxb/erw160) [Medline](#)
44. J. Wang, J. Wang, M. Hu, S. Wu, J. Qi, G. Wang, Z. Han, Y. Qi, N. Gao, H.-W. Wang, J.-M. Zhou, J. Chai, Ligand-triggered allosteric ADP release primes a plant NLR complex. *Science* **364**, eaav5868 (2019). [doi:10.1126/science.aav5868](https://doi.org/10.1126/science.aav5868) [Medline](#)
45. Z. Ge, Y. Zhao, M.-C. Liu, L.-Z. Zhou, L. Wang, S. Zhong, S. Hou, J. Jiang, T. Liu, Q. Huang, J. Xiao, H. Gu, H.-M. Wu, J. Dong, T. Dresselhaus, A. Y. Cheung, L.-J. Qu, LLG2/3 are co-receptors in BUPs/ANX-RALF signaling to regulate *Arabidopsis* pollen tube integrity. *Curr. Biol.* **29**, 3256–3265.e5 (2019). [doi:10.1016/j.cub.2019.08.032](https://doi.org/10.1016/j.cub.2019.08.032) [Medline](#)
46. J. Zhang, B. Wei, R. Yuan, J. Wang, M. Ding, Z. Chen, H. Yu, G. Qin, The Arabidopsis RING-type E3 ligase TEAR1 controls leaf development by targeting the TIE1 transcriptional repressor for degradation. *Plant Cell* **29**, 243–259 (2017). [doi:10.1105/tpc.16.00771](https://doi.org/10.1105/tpc.16.00771) [Medline](#)
47. P. Denninger, A. Reichelt, V. A. F. Schmidt, D. G. Mehlhorn, L. Y. Asseck, C. E. Stanley, N. F. Keinath, J.-F. Evers, C. Grefen, G. Grossmann, Distinct RopGEFs successively drive polarization and outgrowth of root hairs. *Curr. Biol.* **29**, 1854–1865.e5 (2019). [doi:10.1016/j.cub.2019.04.059](https://doi.org/10.1016/j.cub.2019.04.059) [Medline](#)
